# Supplementary material for: Evidence that the 5p12 Variant rs10941679 Confers Susceptibility to Estrogen-Receptor-Positive Breast Cancer through FGF10 and MRPS30 Regulation
Source: PubMed Central journal article supplement (PMC5065698; doi:10.1016/j.ajhg.2016.07.017), 2016-09-15
Supplement: mmc1.pdf [file mmc1.pdf]

## Supplemental Data

### Evidence that the 5p12 Variant rs10941679 Confers

### Susceptibility to Estrogen-Receptor-Positive

### Breast Cancer through *FGF10* and *MRPS30* Regulation

Maya Ghoussaini, Juliet D. French, Kyriaki Michailidou, Silje Nord, Jonathan Beesley, Sander Canisus, Kristine M. Hillman, Susanne Kaufmann, Haran Sivakumaran, Mahdi Moradi Marjaneh, Jason S. Lee, Joe Dennis, Manjeet K. Bolla, Qin Wang, Ed Dicks, Roger L. Milne, John L. Hopper, Melissa C. Southey, Marjanka K. Schmidt, Annegien Broeks, Kenneth Muir, Artitaya Lophatananon, Peter A. Fasching, Matthias W. Beckmann, Olivia Fletcher, Nichola Johnson, Elinor J. Sawyer, Ian Tomlinson, Barbara Burwinkel, Frederik Marme, Pascal Guénel, Thérèse Truong, Stig E. Bojesen, Henrik Flyger, Javier Benitez, Anna González-Neira, M. Rosario Alonso, Guillermo Pita, Susan L. Neuhausen, Hoda Anton-Culver, Hermann Brenner, Volker Arndt, Alfons Meindl, Rita K. Schmutzler, Hiltrud Brauch, Ute Hamann, Daniel C. Tessier, Daniel Vincent, Heli Nevanlinna, Sofia Khan, Keitaro Matsuo, Hidemi Ito, Thilo Dörk, Natalia V. Bogdanova, Annika Lindblom, Sara Margolin, Arto Mannermaa, Veli-Matti Kosma, kConFab/AOCS Investigators, Anna H. Wu, David Van Den Berg, Diether Lambrechts, Giuseppe Floris, Jenny Chang-Claude, Anja Rudolph, Paolo Radice, Monica Barile, Fergus J. Couch, Emily Hallberg, Graham G. Giles, Christopher A. Haiman, Loic Le Marchand, Mark S. Goldberg, Soo H. Teo, Cheng Har Yip, Anne-Lise Borresen-Dale, NBCS Collaborators, Wei Zheng, Qiuyin Cai, Robert Winqvist, Katri Pylkäs, Irene L. Andrulis, Peter Devilee, Rob A.E.M. Tollenaar, Montserrat García-Closas, Jonine Figueroa, Per Hall, Kamila Czene, Judith S. Brand, Hatf Darabi, Mikael Eriksson, Maartje J. Hooning, Linetta B. Koppert, Jingmei Li, Xiao-Ou Shu, Ying Zheng, Angela Cox, Simon S. Cross, Mitul Shah, Valerie Rhenius, Ji-Yeob Choi, Daehee Kang, Mikael Hartman, Kee Seng Chia, Maria Kabisch, Diana Torres, Craig Luccarini, Don M. Conroy, Anna Jakubowska, Jan Lubinski, Suleeporn Sangrajrang, Paul Brennan, Curtis Olswold, Susan Slager, Chen-Yang Shen, Ming-Feng Hou, Anthony Swerdlow, Minouk J. Schoemaker, Jacques Simard, Paul D.P. Pharoah, Vessela Kristensen, Georgia Chenevix-Trench, Douglas F. Easton, Alison M. Dunning, and Stacey L. Edwards

## **SUPPLEMENTAL ACKNOWLEDGMENTS**

We thank all the individuals who took part in these studies and all the researchers, clinicians, technicians and administrative staff who have enabled this work to be carried out. The procedures followed were in accordance with the ethical standards of the responsible committee on human experimentation (institutional and national) and that proper informed consent was obtained. This study would not have been possible without the contributions of the following: Andrew Berchuck (OCAC), Rosalind A. Eeles, Ali Amin Al Olama, Zsofia Kote-Jarai, Sara Benlloch (PRACTICAL), Craig Luccarini and the staff of the Centre for Genetic Epidemiology Laboratory, the staff of the CNIO genotyping unit, Daniel C. Tessier, Francois Bacot, Daniel Vincent, Sylvie LaBoissière and Frederic Robidoux and the staff of the McGill University and Génome Québec Innovation Centre, Sune F. Nielsen, Borge G. Nordestgaard, and the staff of the Copenhagen DNA laboratory, and Julie M. Cunningham, Sharon A. Windebank, Christopher A. Hilker, Jeffrey Meyer and the staff of Mayo Clinic Genotyping Core Facility. Normal human tissues from the Susan G. Komen for the Cure® Tissue Bank at the IU Simon Cancer Center, Indianapolis were used in this study. We thank contributors, including Indiana University who collected samples used in this study, as well as donors and their families, whose help and participation made this work possible. Also NIHR Support to the Royal Marsden Biomedical Research Centre. Funding for the iCOGS infrastructure came from: the European Community's Seventh Framework Programme under grant agreement n° 223175 (HEALTH-F2-2009-223175) (COGS), Cancer Research UK (C1287/A10118, C1287/A10710, C12292/A11174, C1281/A12014, C5047/A8384, C5047/A15007, C5047/A10692, C8197/A16565), the National Institutes of Health (CA128978) and Post-Cancer GWAS initiative (1U19 CA148537, 1U19 CA148065 and 1U19 CA148112 - the GAME-ON initiative), the Department of Defence (W81XWH-10-1-0341), the Canadian Institutes of Health Research (CIHR) for the CIHR Team in Familial Risks of Breast Cancer, Komen Foundation for the Cure, the Breast Cancer Research Foundation, and the Ovarian Cancer Research Fund. The QIMR Berghofer group was supported by a National Health and Medical Research Council of Australia project grant (1058415). GCT is an NHMRC Senior Principal Research Fellow. SLE and JDF are supported by Fellowships from the National Breast Cancer Foundation (NBCF) Australia. SN is supported by a carrier grant from the Norwegian Regional Health authorities (Grant number 2014061). The funders have no role in study design, data collection and analysis, decision to publish, or preparation of the manuscript. The authors declare no competing financial interests.

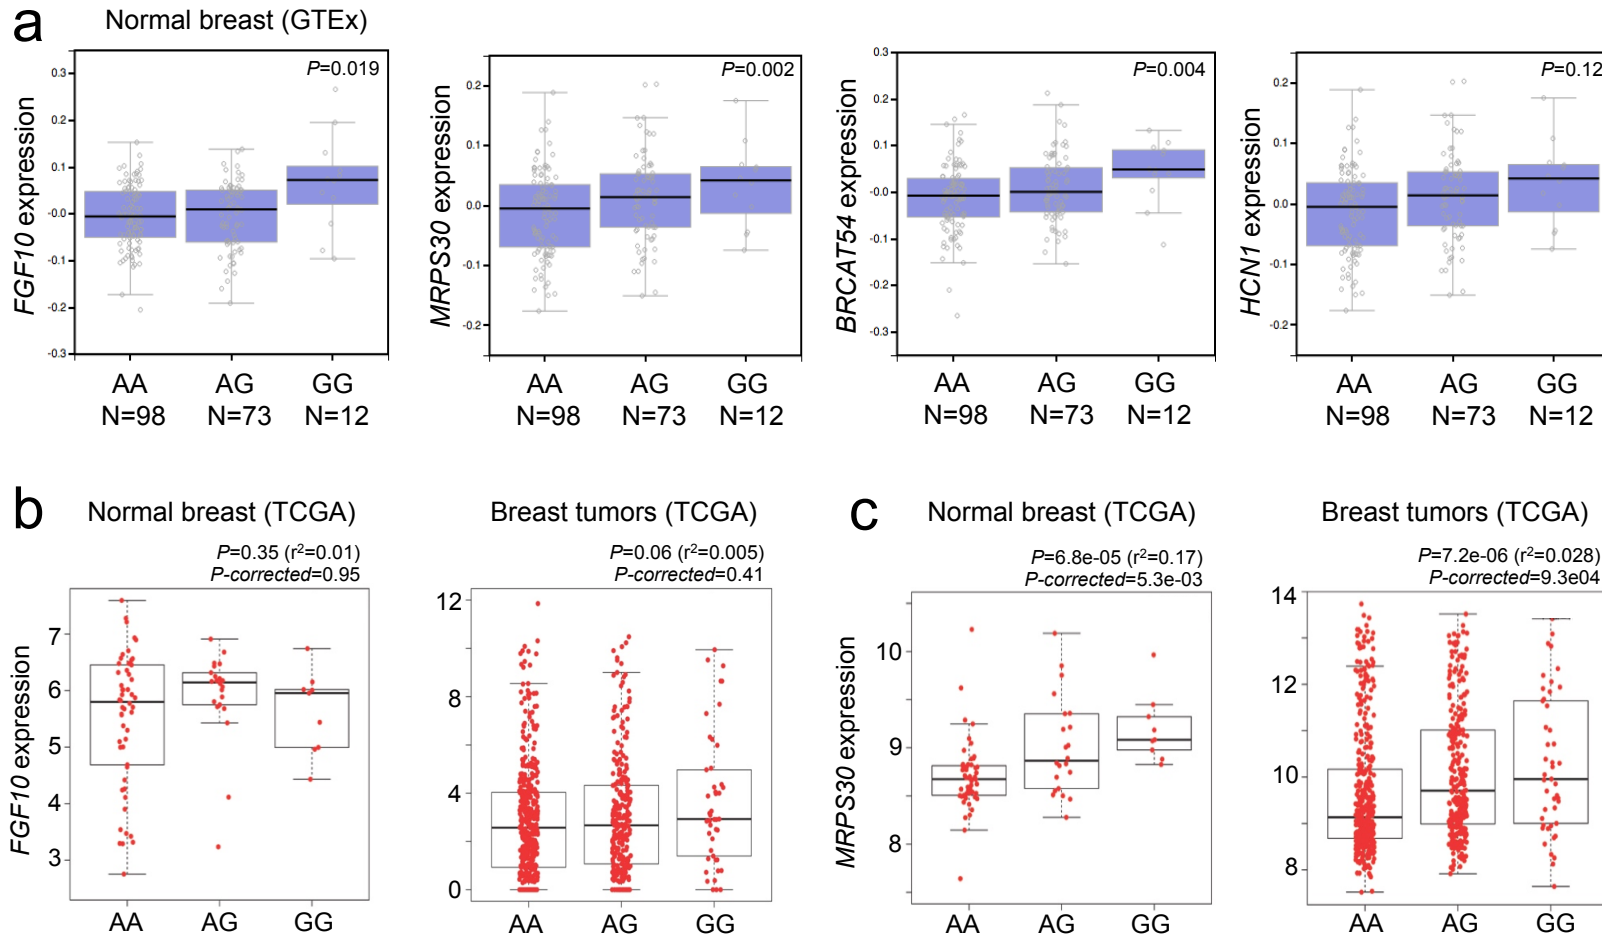

**Supplementary Figure 1. Associations of SNP rs10941679 with expression of candidate target genes. (a)** 183 normal breast samples from the GTEx database, **(b)** *FGF10* or **(c)** *MRPS30* in normal breast TCGA (n=93) and breast tumours TCGA (n=765). The x-axis of each plot corresponds to the three observed SNP genotypes and the y-axis represents log<sub>2</sub>-normalized gene expression values. *P*-values in the GTEx datasets are pre-corrected for multiple testing. *P*-values in the TCGA datasets are presented before and after correction for multiple testing using FDR as implemented in p.adjust function in R. Each box plot shows the median rank normalized gene expression (horizontal line), the first through third quartiles (box) and 1.5× the interquartile range (whiskers).

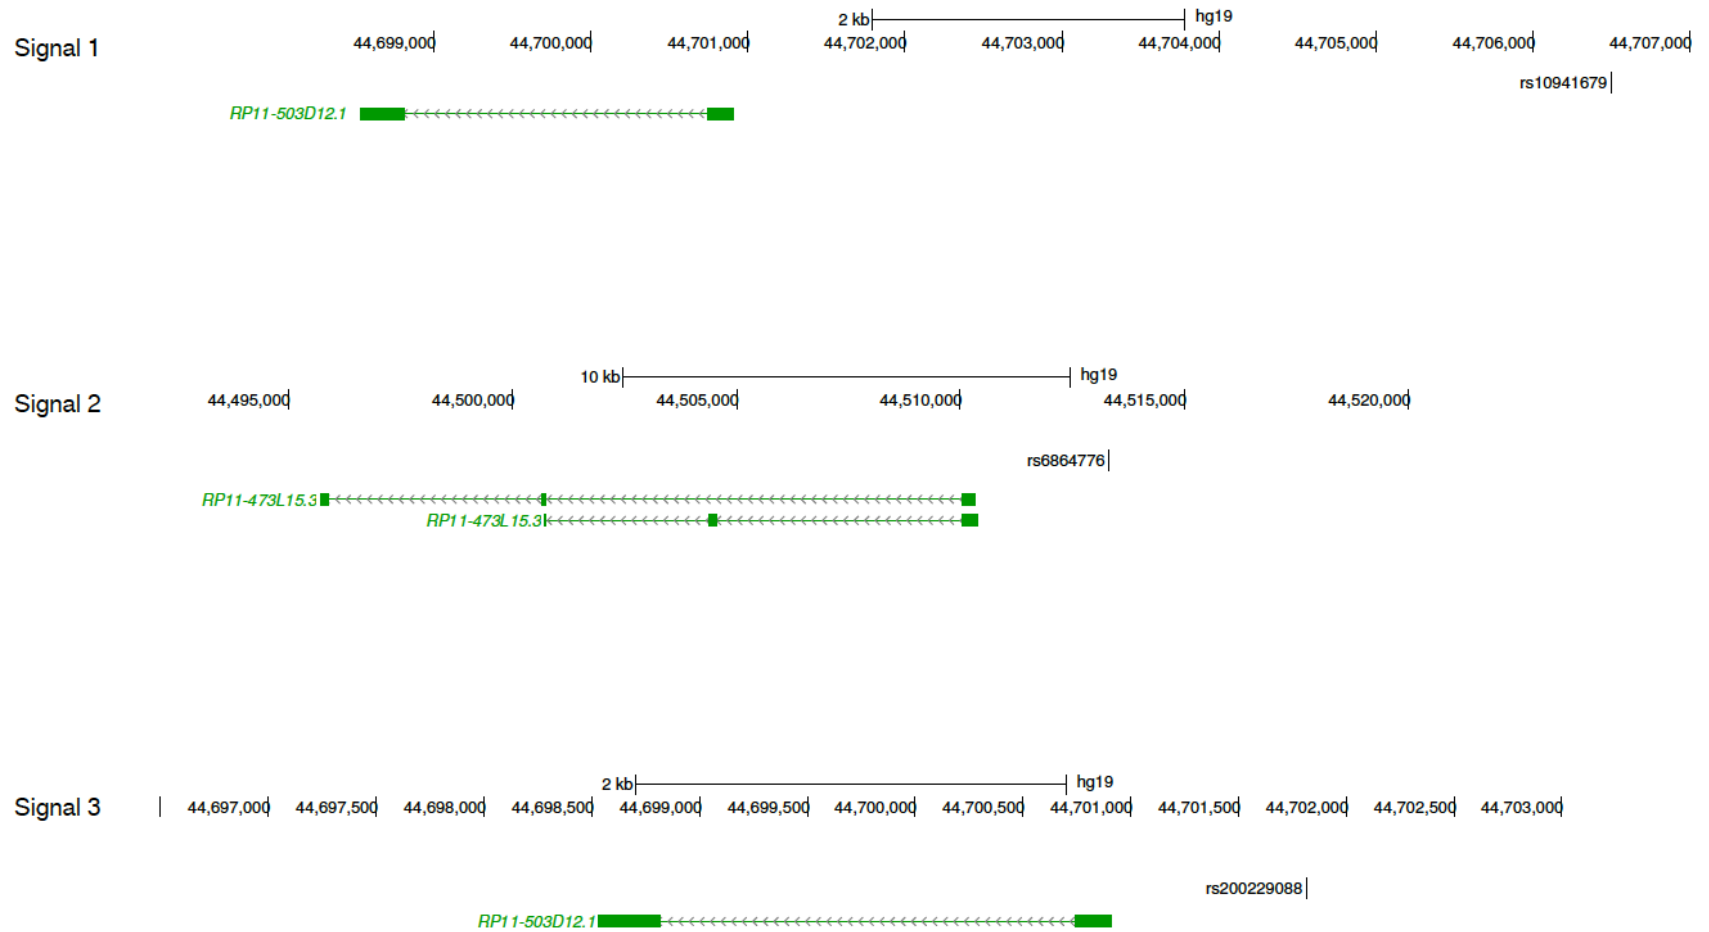

**Supplementary Figure 2. Location of putative noncoding RNAs close to the top risk SNPs.** The top risk SNPs from each signal are shown as small horizontal lines and labelled. Green boxes represent putative noncoding RNAs.

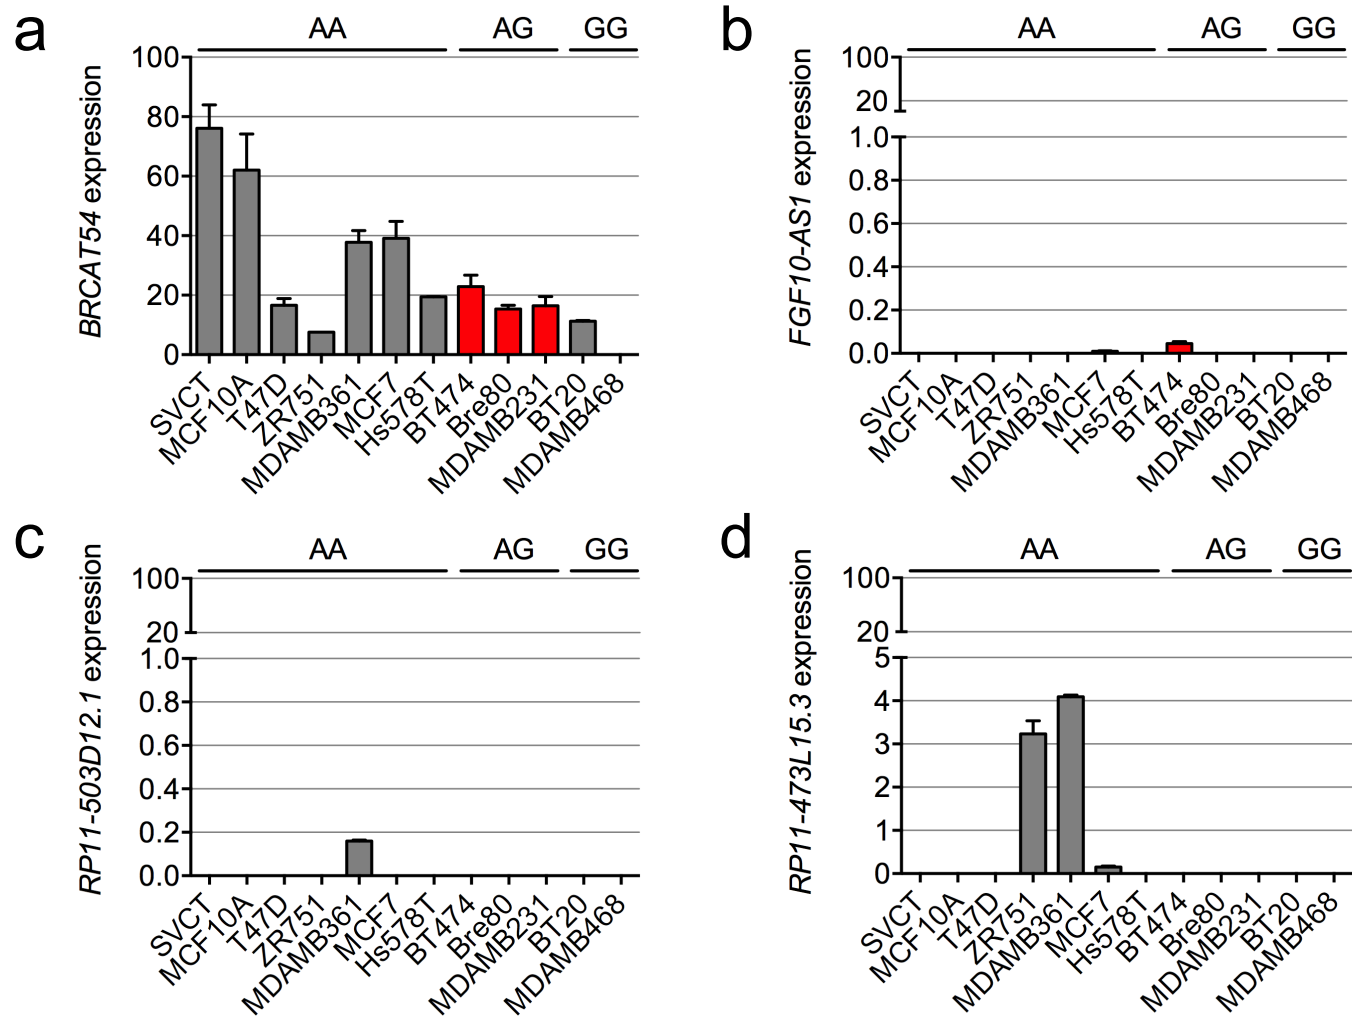

**Supplementary Figure 3.** Putative noncoding RNA expression measured by qPCR in untreated breast cell lines and normalised to *TBP*. Error bars denote SEM (n=3).

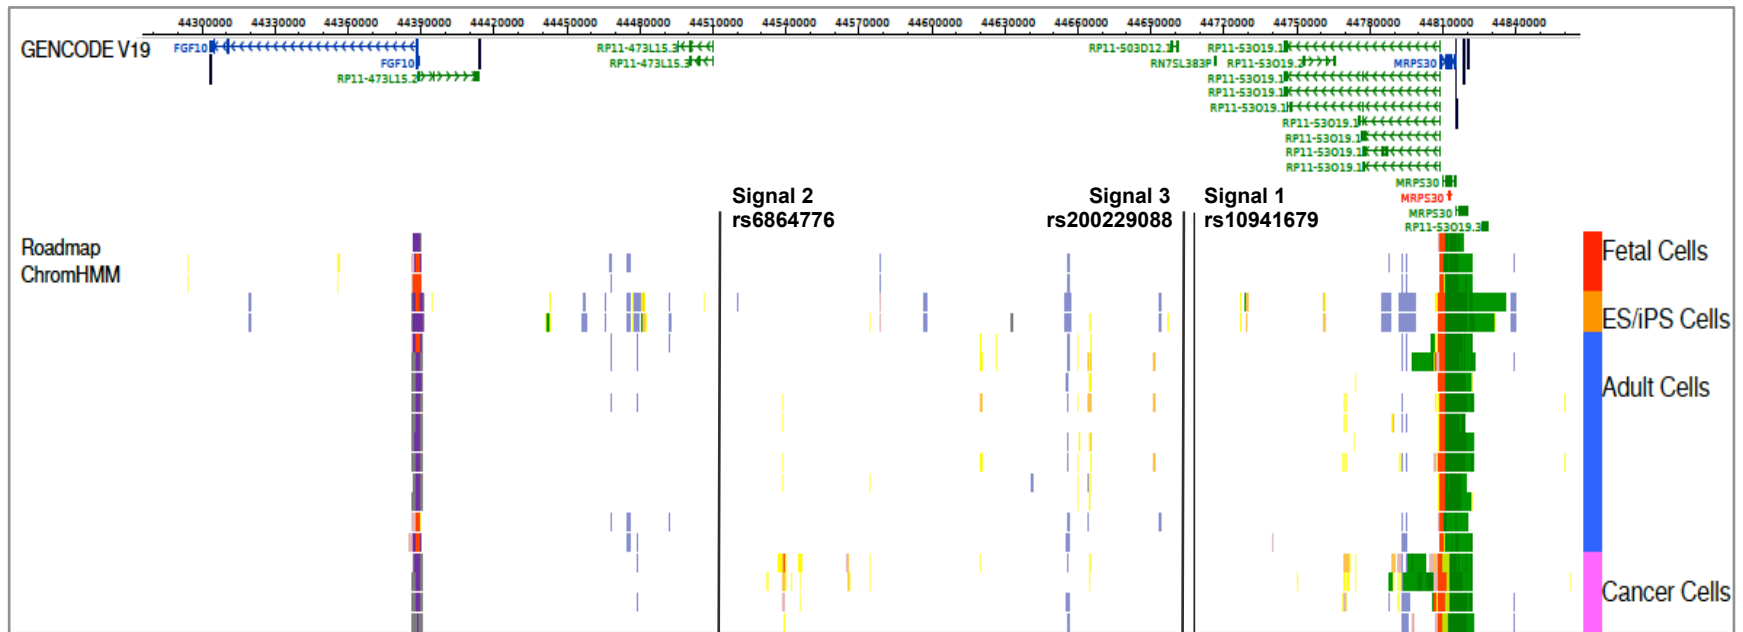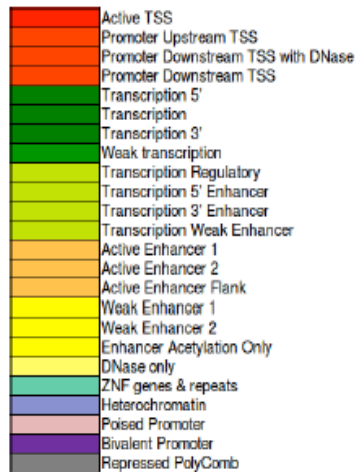

**Supplementary Figure 4.** Genomic region (chr5:44276112-44866764) showing chromatin state annotations called by Roadmap Epigenomics Project Chromatin Hidden Markov Modelling (Imputed ChromHMM) relative to GENCODE V19 gene models. The 25 states of chromatin segmentation depicted as colors along the genomic axis are described in the key. The position of top risk SNPs for signals 1-3 are shown by the vertical black lines.

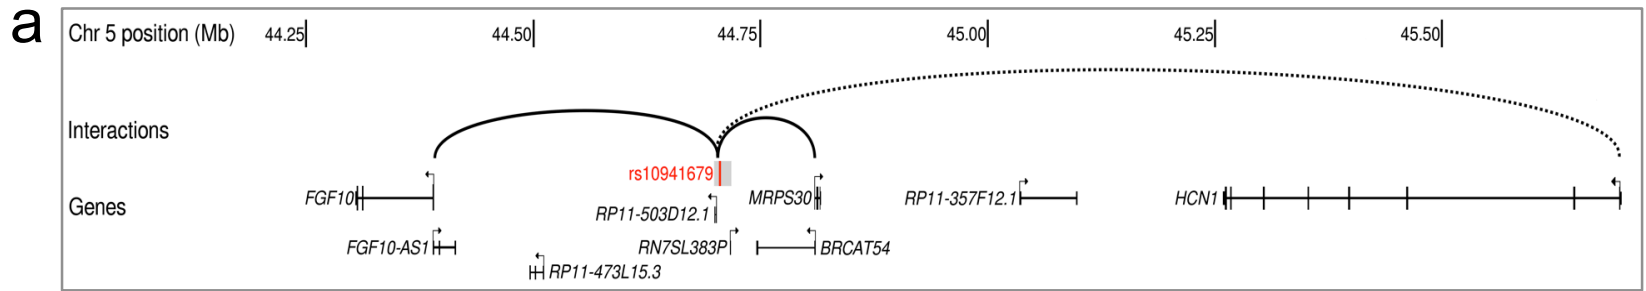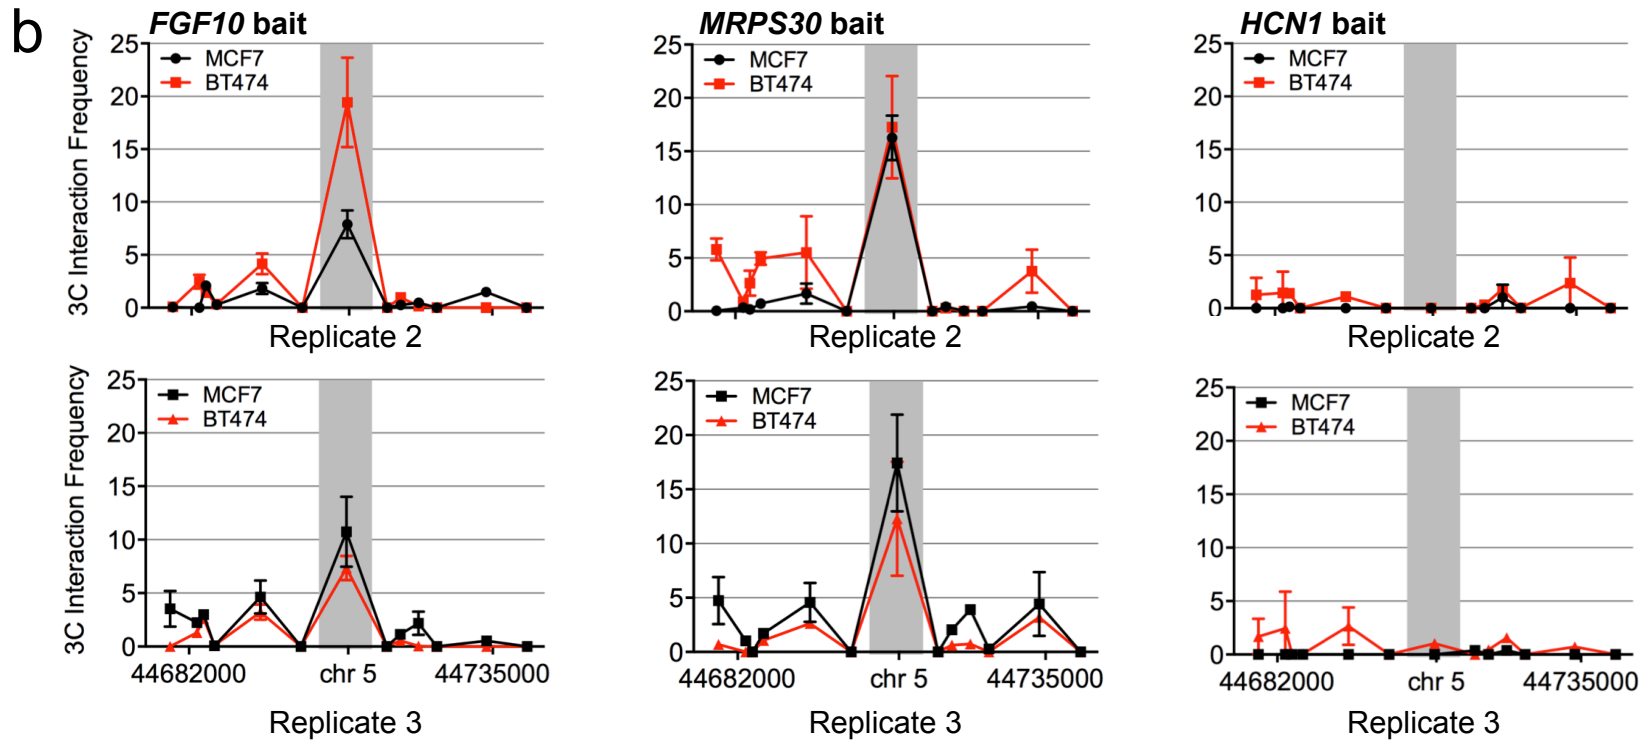

**C**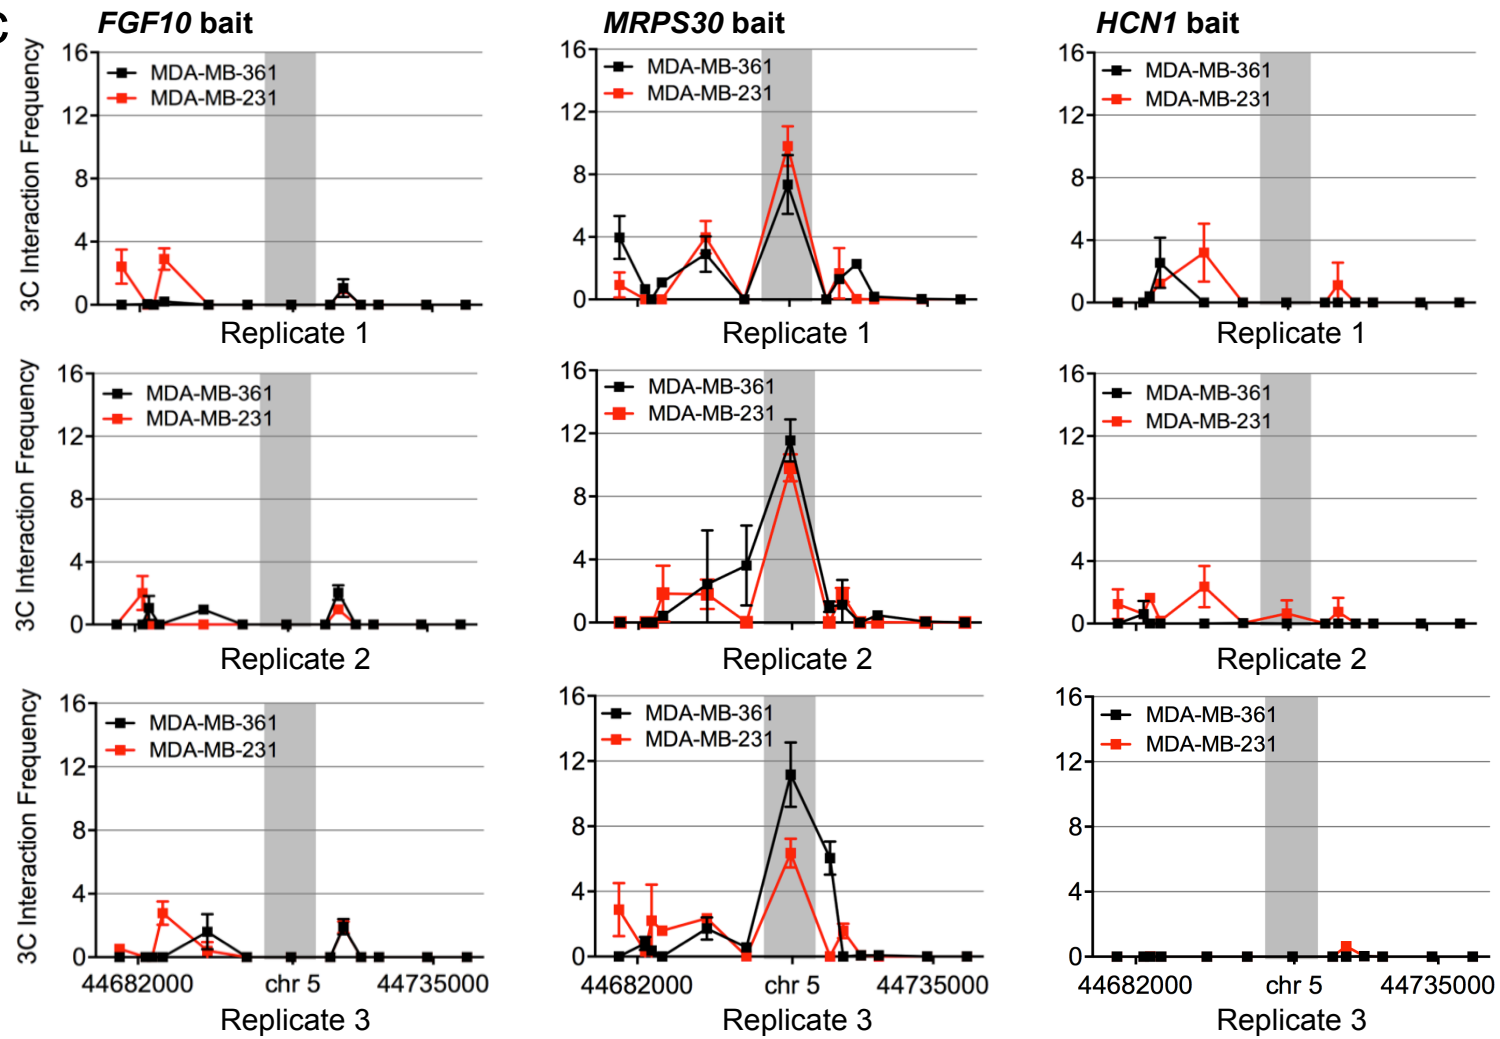



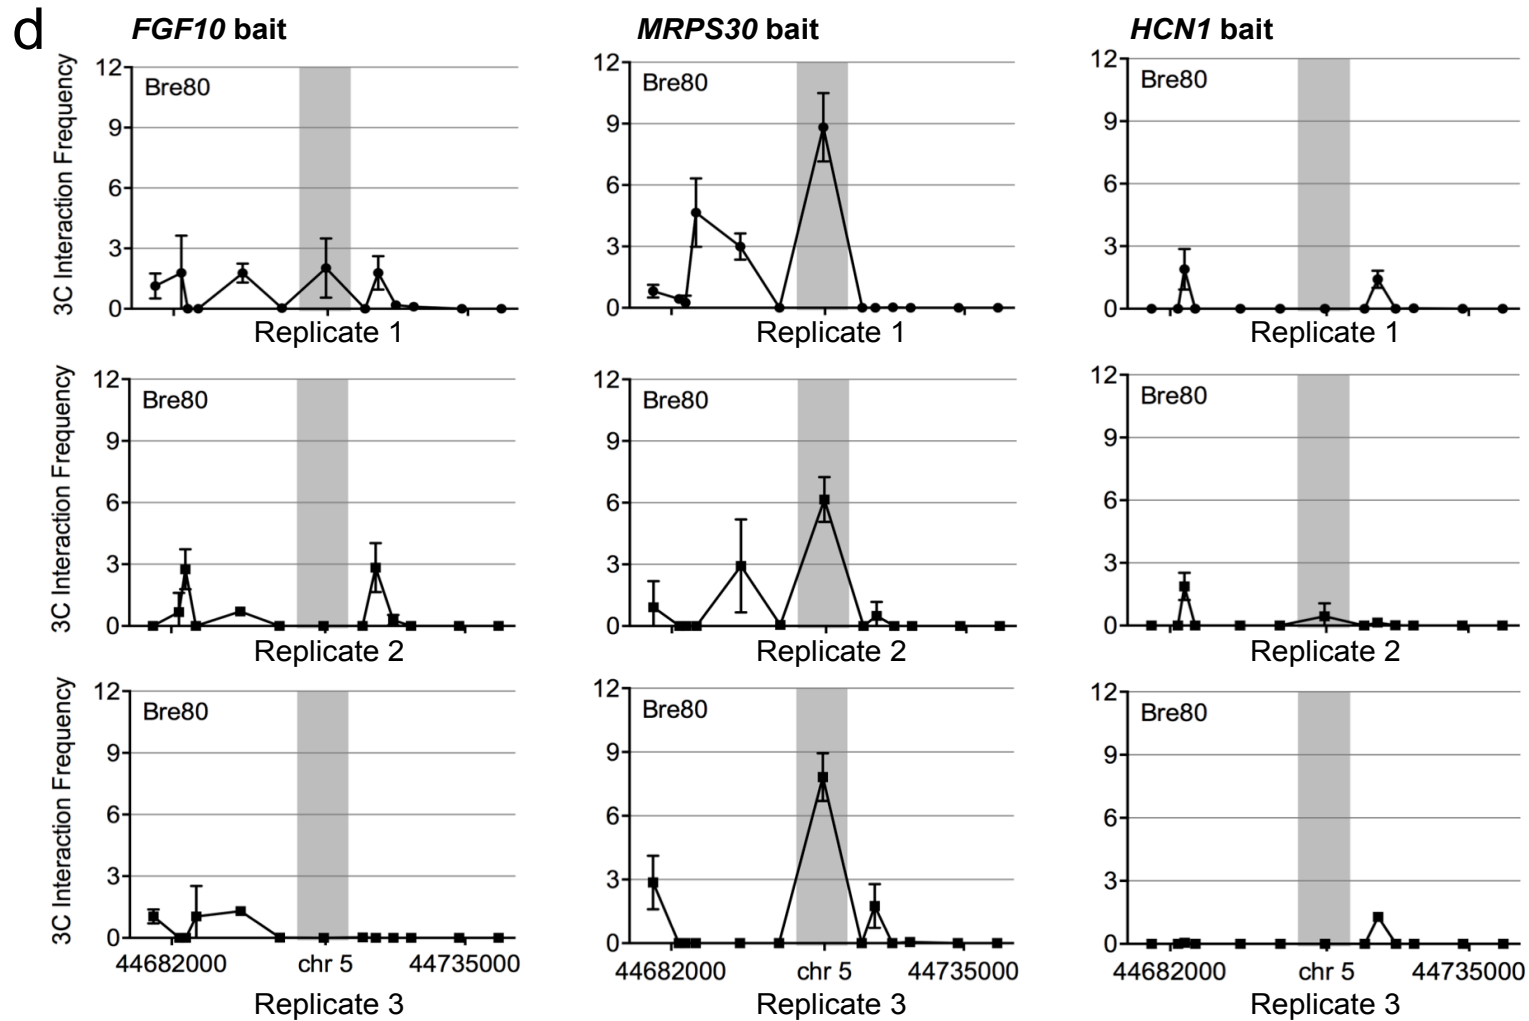

**Supplementary Figure 5. Chromatin interactions at 5p12 in breast cancer cell lines. (a)** Physical map of the region interrogated by 3C. 3C interaction profiles between the *FGF10/FGF10AS-1*, *MRPS30/BRCAT54* or *HCN1* promoters and the putative regulatory element (PRE, grey bars) containing SNP rs10941679 in **(b)** ER<sup>+</sup>/PR<sup>+</sup> MCF7 and BT474, **(c)** ER<sup>+</sup>/PR<sup>-</sup> MDA-MB-361 or ER<sup>-</sup>/PR<sup>-</sup> MDA-MB-231 breast cancer cell lines and **(d)** ER<sup>-</sup> Bre80 normal breast cells. 3C libraries were generated with *Eco*RI, with the anchor points set at the promoters. Error bars denote SD.

**a** 5p12 PRE ← *EcoRI* → *FGF10* promoter

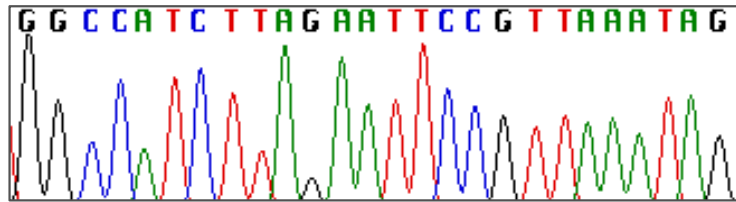

**b** *MRPS30* prom ← *EcoRI* → 5p12 PRE

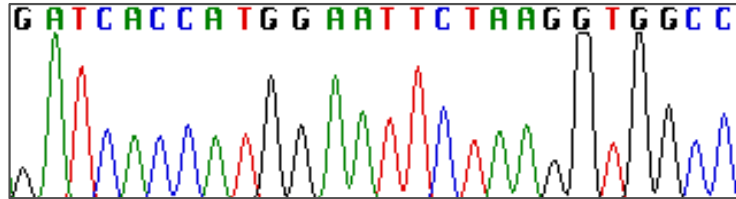

**Supplementary Figure 6. DNA sequencing to confirm chromatin interactions.** Chromatogram of 3C products amplified between the (a) *FGF10* or (b) *MRPS30* promoters and the 5p12 putative regulatory element (PRE) containing SNP rs10941679.

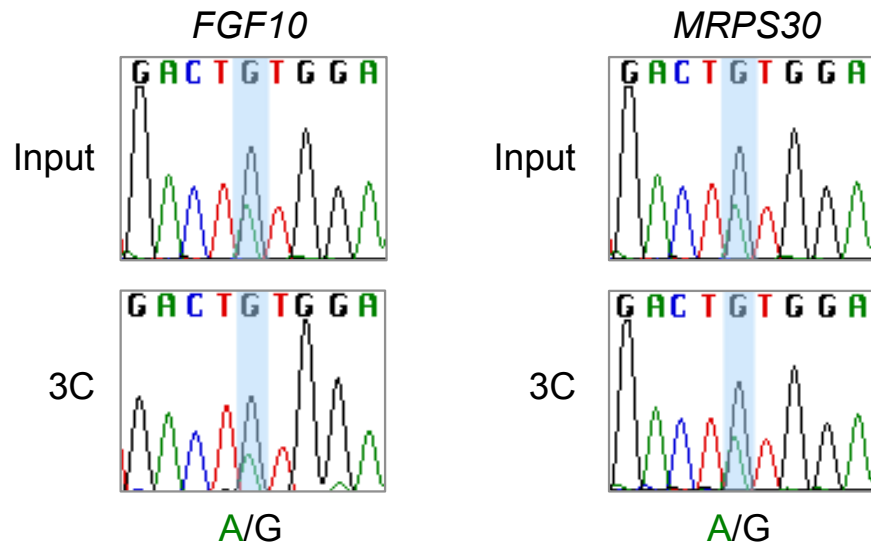

**Supplementary Figure 7. SNP rs10941679 does not influence chromatin looping between the PRE and *FGF10* or *MRPS30* promoters.** 3C followed by sequencing for the rs10941679-containing region in heterozygous BT474 ER+ breast cancer cells.

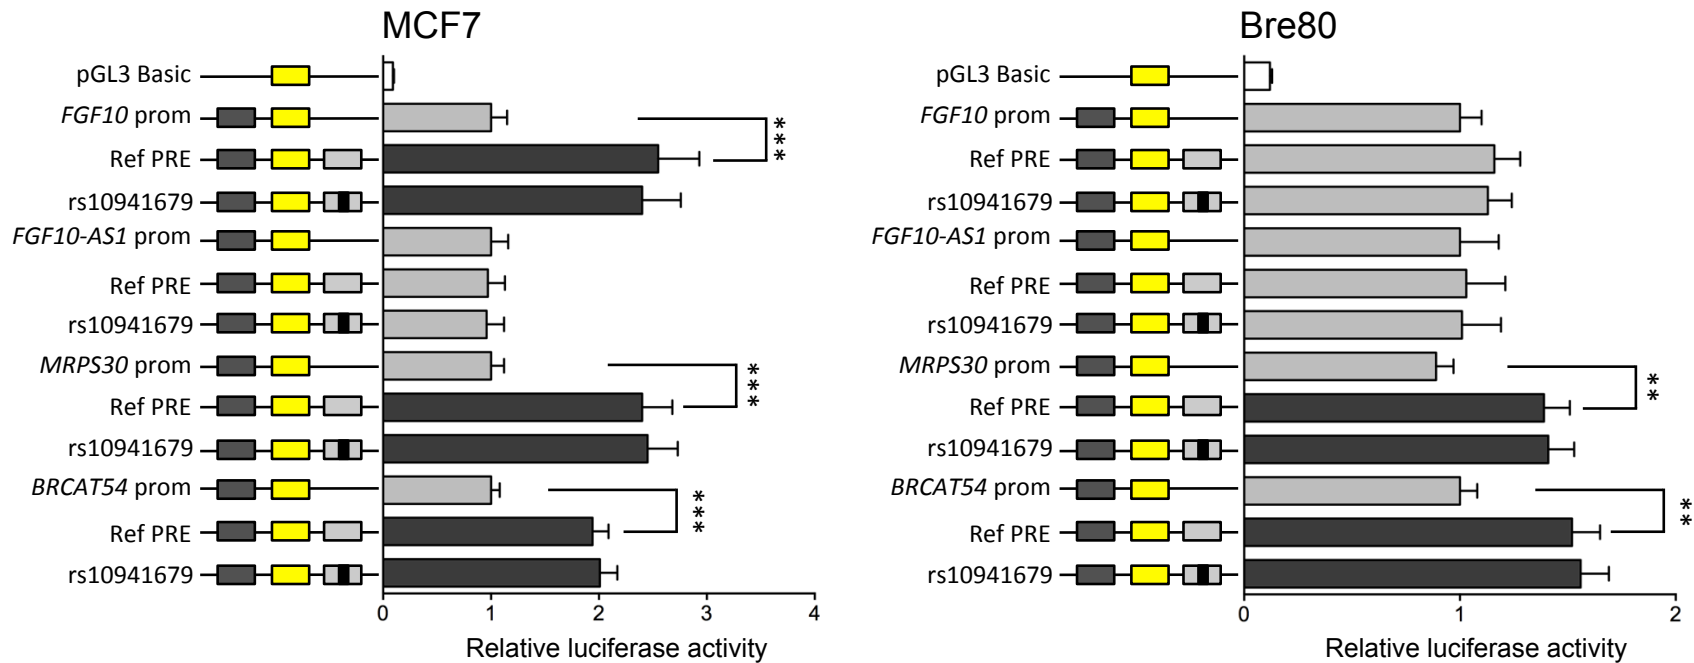

**Supplementary Figure 8. Luciferase reporter assays in ER<sup>+</sup> MCF7 and ER<sup>-</sup> Bre80 breast cell lines.** The putative regulatory element containing the major SNP allele was cloned downstream of target gene promoter-driven luciferase constructs (Ref PRE). The minor SNP allele was engineered into the constructs and is designated by the rs ID. Error bars denote 95% confidence intervals (n=3). *P*-values were determined by 2-way ANOVA followed by Dunnett's multiple comparisons test. \*\**P*<0.01, \*\*\**P*<0.001.

**a**

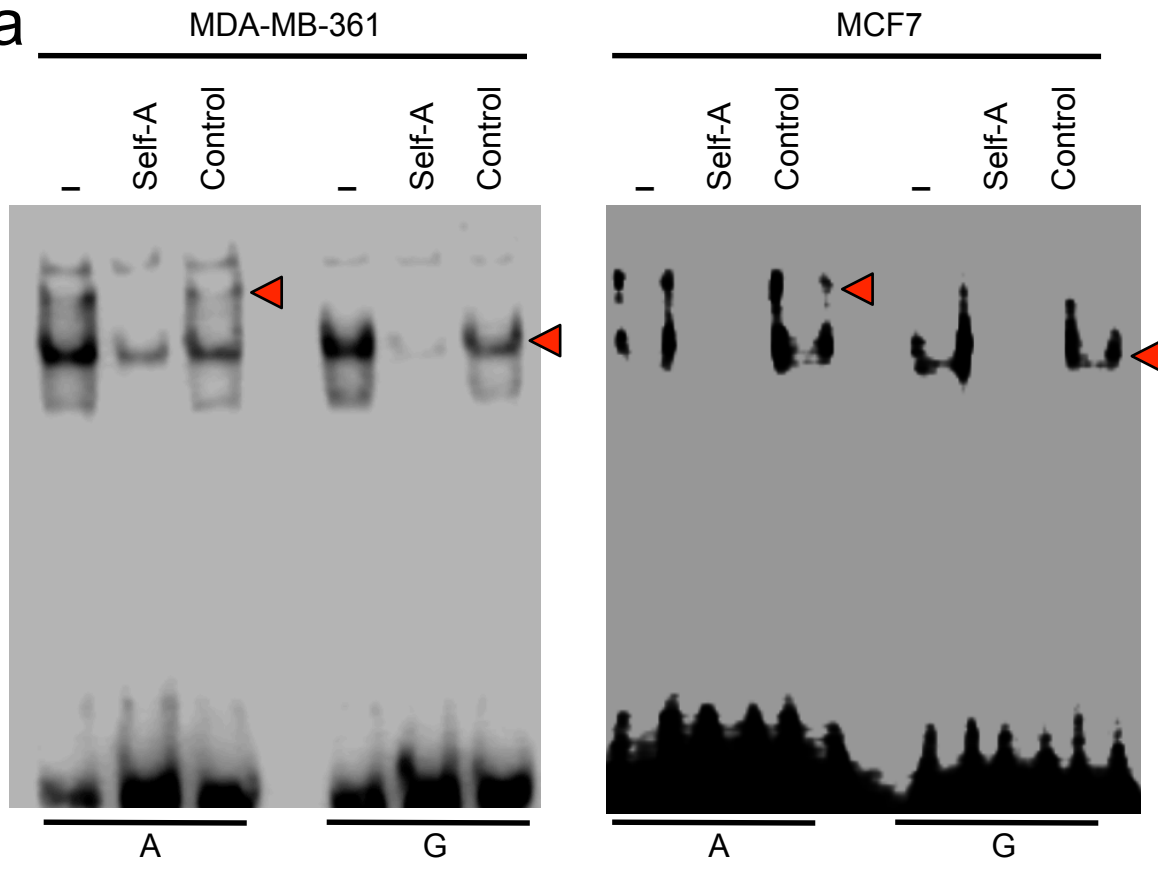

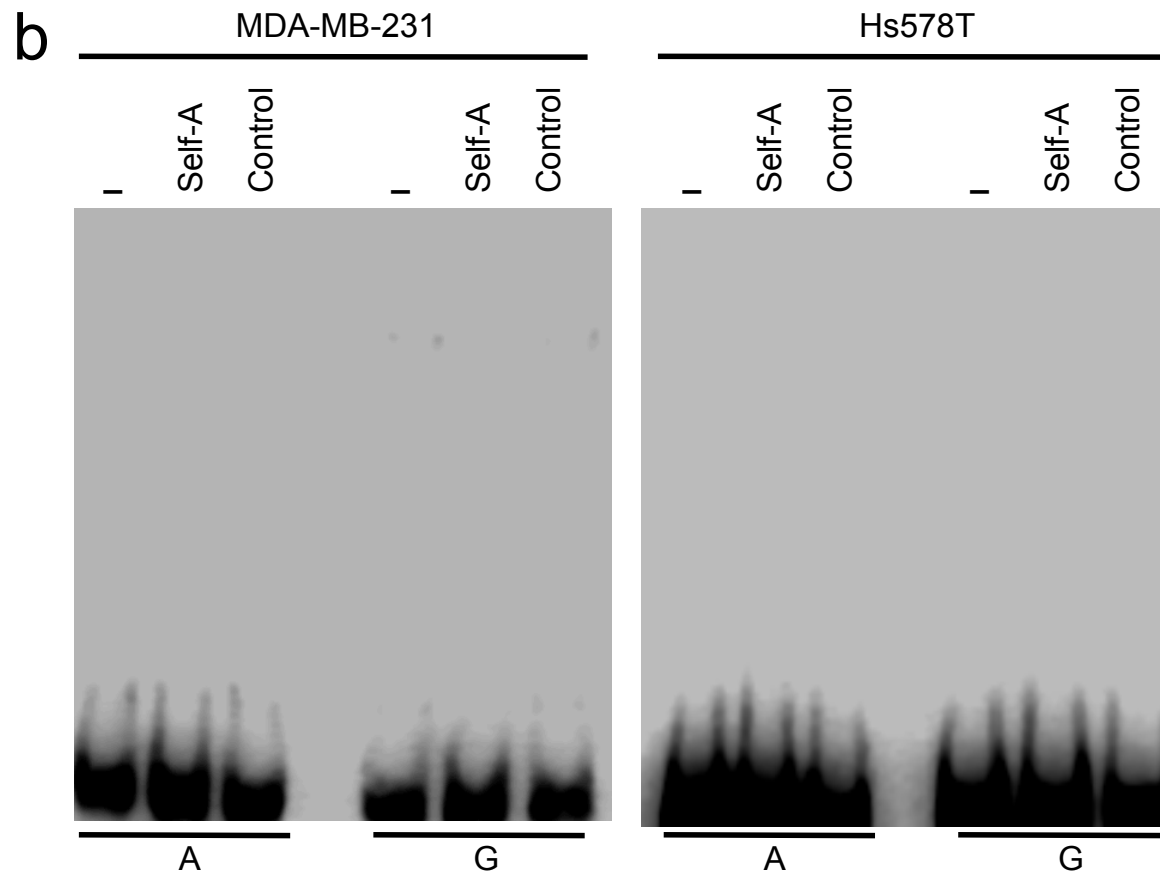

**Supplementary Figure 9. EMSAs for oligonucleotides containing SNP rs10941679.** The A=common allele and G=minor allele as indicated below the panel, assayed using (a) ER<sup>+</sup>/PR<sup>-</sup> MDA-MB-361, ER<sup>+</sup>/PR<sup>+</sup> MCF7 and (b) ER<sup>-</sup>/PR<sup>-</sup> MDA-MB-231 and Hs578T nuclear extracts. Primers are listed in **Table S8**. Labels above each lane indicate inclusion of competitor oligonucleotides at 100-fold molar excess, respectively: (-) no competitor and control denotes a non-specific competitor. Red arrowheads show bands of different mobility detected between the A and G alleles.

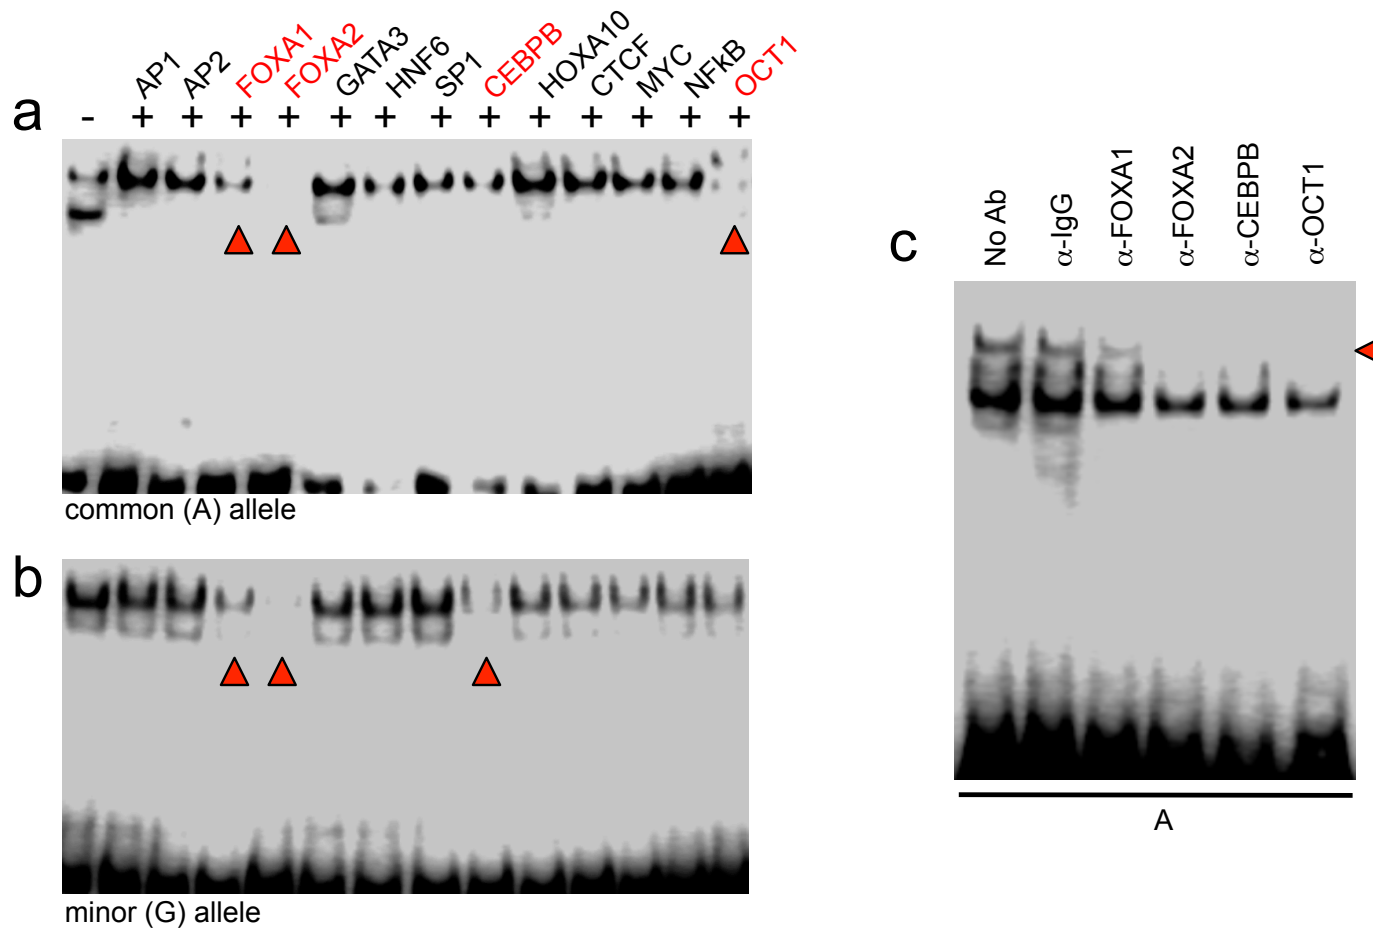

**Supplementary Figure 10. Competition EMSAs for SNP rs10941679 to identify candidate nuclear proteins.** Competitor oligonucleotides for predicted transcription factors (100-fold molar excess) were incubated with ER<sup>+</sup> BT474 nuclear extracts (competitor sequences are listed in **Table S9**). Red arrowheads indicate bands that were competed for complex formation on either the **(a)** common or **(b)** minor alleles. **(c)** EMSA-supershift using the common DNA duplex and 2  $\mu$ g of polyclonal antibody against FOXA1 (ab5089, abcam), FOXA2 (sc-20692, Santa Cruz Biotechnology), CEBPB (sc-150) or OCT1 (sc-232) with BT474 nuclear extracts. Rabbit IgG (sc-2027) was used as a negative control. The red arrowhead denotes supershifted complexes.

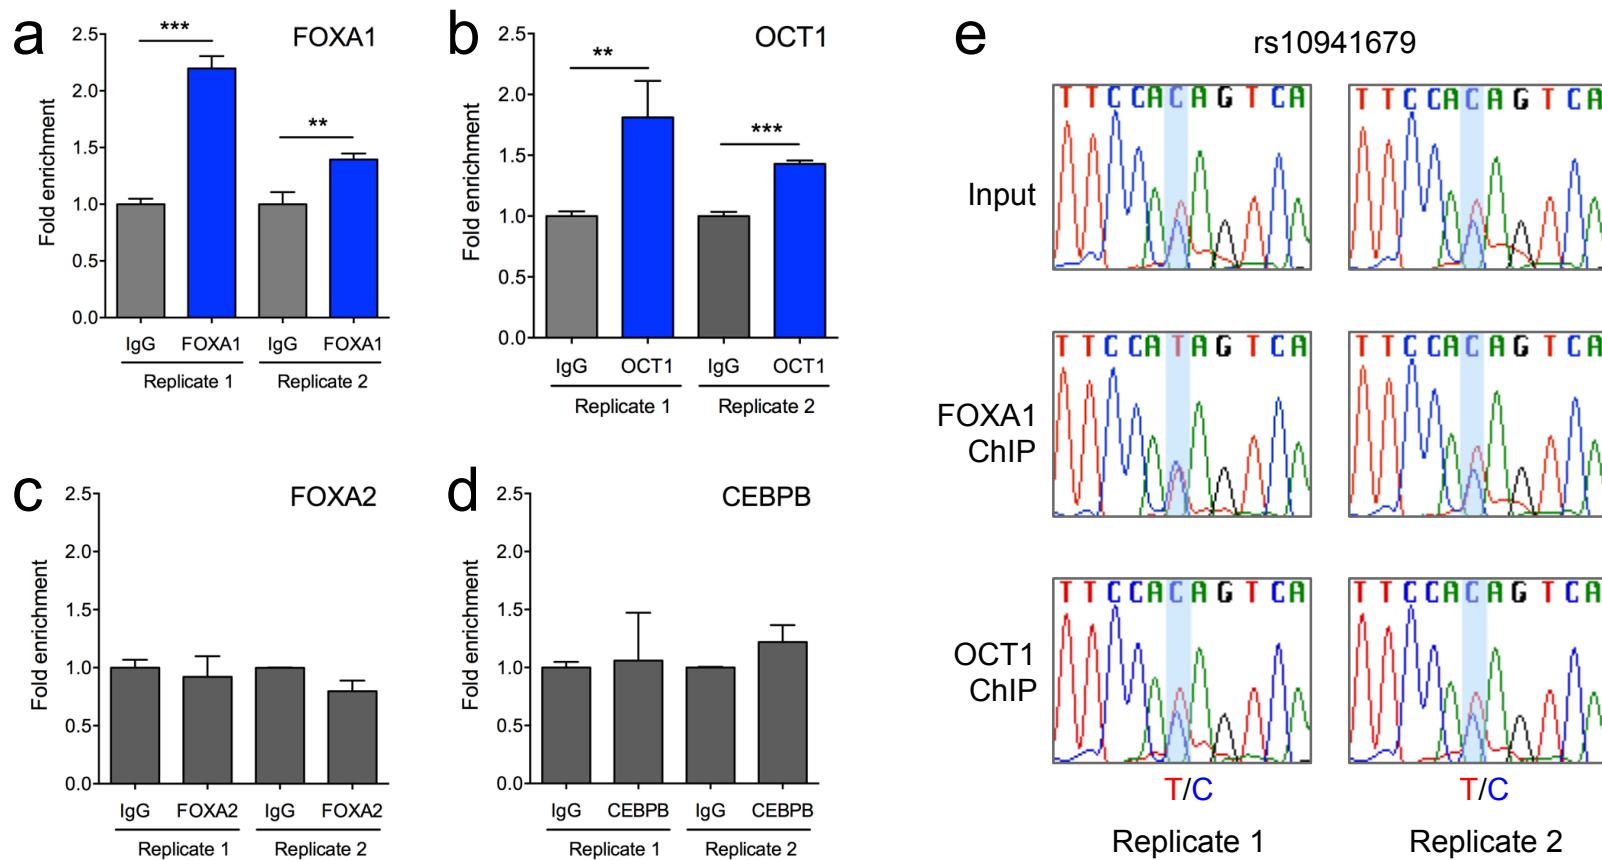

**Supplementary Figure 11. FOXA1 and OCT1 binding *in vivo*.** ChIP-qPCR results against (a) FOXA1, (b) OCT1, (c) FOXA2 or (d) CEBPB in heterozygous BT474 breast cancer cells. Error bars denote SD (n=2). A region within the second intron of *ESR1* served as a negative (Neg) control. *P*-values were determined by two-tailed t-t test. \*\**P*<0.01, \*\*\**P*<0.001. (e) Sanger sequencing of the PCR fragment generated using primers flanking SNP rs10941679 following ChIP-qPCR. Primers are listed in **Table S10**.



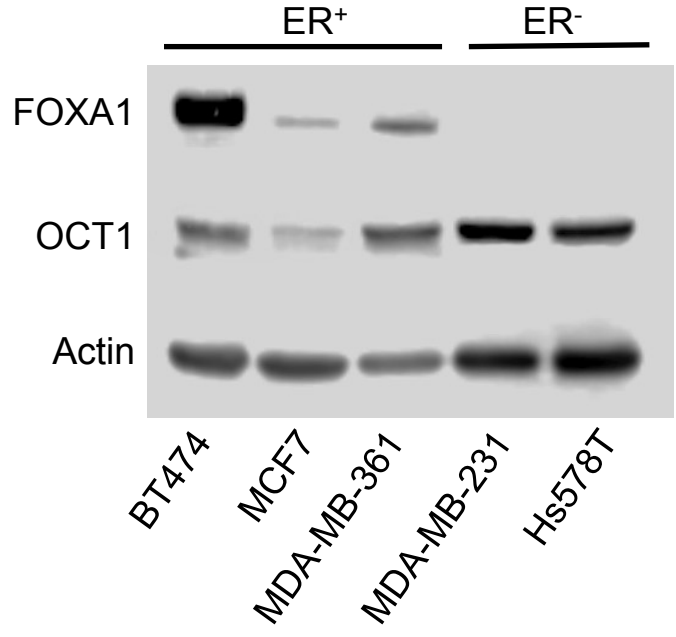

**Supplementary Figure 12. Western blot analysis of FOXA1 and OCT1 protein expression in breast cancer cell lines.** Actin (Sigma A2066) served as a loading control.

**Supplementary Table 1.** Strongest Associated SNPs (n=461  $P<10^{-4}$ ) with overall breast cancer risk from 41 European BCAC studies (n=104,660). \* Type refers to either genotyped or imputed SNPs.

| SNP             | position | Ref | Alt  | EAF  | OR overall | Pvalue overall | OR ER+ | Pvalue ER+ | OR ER- | Pvalue ER- | Type | R <sup>2</sup> |
|-----------------|----------|-----|------|------|------------|----------------|--------|------------|--------|------------|------|----------------|
| rs10941679      | 44706498 | A   | G    | 0.27 | 1.12       | 2.55E-26       | 1.15   | 2.44E-29   | 1.04   | 0.08       | Gen  | 0.99           |
| rs10462082      | 44800917 | A   | C    | 0.50 | 1.1        | 9.11E-22       | 1.11   | 3.40E-20   | 1.06   | 0.00       | Imp  | 0.95           |
| c5_pos44911206  | 44875449 | A   | G    | 0.48 | 0.91       | 1.67E-21       | 0.90   | 3.28E-21   | 0.95   | 0.01       | Gen  | 1.00           |
| rs6451770       | 44691395 | T   | G    | 0.39 | 1.1        | 2.50E-21       | 1.13   | 4.76E-25   | 1.01   | 0.59       | Gen  | 1.00           |
| rs7716600       | 44875005 | A   | C    | 0.77 | 0.9        | 4.13E-21       | 0.87   | 3.17E-24   | 0.96   | 0.09       | Gen  | 1.00           |
| rs930395        | 44822458 | G   | A    | 0.23 | 1.11       | 7.58E-21       | 1.14   | 4.87E-24   | 1.04   | 0.08       | Gen  | 1.00           |
| rs13185555      | 44690964 | G   | A    | 0.39 | 1.1        | 7.59E-21       | 1.13   | 5.36E-25   | 1.01   | 0.75       | Imp  | 0.98           |
| rs76514876      | 44673354 | A   | C    | 0.41 | 1.1        | 4.91E-20       | 1.12   | 5.39E-23   | 1.01   | 0.72       | Imp  | 0.98           |
| rs4463188       | 44642670 | T   | C    | 0.41 | 1.09       | 5.35E-20       | 1.12   | 8.29E-23   | 1.00   | 0.80       | Gen  | 1.00           |
| rs4321755       | 44646195 | C   | T    | 0.41 | 1.09       | 6.44E-20       | 1.12   | 6.75E-23   | 1.00   | 0.81       | Gen  | 1.00           |
| rs4339357       | 44670741 | T   | C    | 0.40 | 1.1        | 6.64E-20       | 1.12   | 9.24E-23   | 1.01   | 0.56       | Imp  | 0.97           |
| rs4479849       | 44644006 | G   | A    | 0.41 | 1.09       | 6.93E-20       | 1.12   | 4.92E-23   | 1.00   | 0.85       | Gen  | 1.00           |
| rs12187196      | 44683819 | A   | C    | 0.41 | 1.09       | 7.47E-20       | 1.12   | 8.48E-23   | 1.01   | 0.62       | Gen  | 1.00           |
| rs36068815      | 44645998 | T   | C    | 0.41 | 1.09       | 7.80E-20       | 1.12   | 5.15E-23   | 1.00   | 0.84       | Gen  | 1.00           |
| rs13155752      | 44680687 | A   | C    | 0.41 | 1.09       | 1.65E-19       | 1.12   | 7.46E-23   | 1.01   | 0.71       | Imp  | 0.98           |
| rs13156283      | 44680758 | G   | C    | 0.41 | 1.09       | 1.66E-19       | 1.12   | 7.48E-23   | 1.01   | 0.71       | Imp  | 0.98           |
| rs4492118       | 44646625 | G   | A    | 0.41 | 1.09       | 1.86E-19       | 1.12   | 1.98E-22   | 1.01   | 0.79       | Gen  | 1.00           |
| rs7735881       | 44650176 | A   | G    | 0.41 | 1.09       | 1.90E-19       | 1.12   | 1.15E-22   | 1.00   | 0.82       | Gen  | 1.00           |
| rs12516900      | 44644495 | A   | G    | 0.41 | 1.09       | 2.27E-19       | 1.12   | 2.34E-22   | 1.01   | 0.78       | Gen  | 1.00           |
| rs6861560       | 44708378 | C   | G    | 0.41 | 1.09       | 2.31E-19       | 1.12   | 7.82E-23   | 1.01   | 0.71       | Imp  | 0.98           |
| rs1821936       | 44699482 | A   | C    | 0.41 | 1.09       | 2.42E-19       | 1.12   | 1.30E-22   | 1.01   | 0.67       | Imp  | 0.99           |
| chr5:44648592:I | 44648592 | C   | CTAT | 0.41 | 1.09       | 2.42E-19       | 1.12   | 2.22E-22   | 1.01   | 0.76       | Imp  | 0.98           |
| chr5:44645330:D | 44645330 | AG  | A    | 0.40 | 1.1        | 2.50E-19       | 1.12   | 3.61E-22   | 1.01   | 0.77       | Imp  | 0.95           |
| rs6874055       | 44666965 | T   | A    | 0.41 | 1.09       | 2.51E-19       | 1.12   | 1.70E-22   | 1.01   | 0.75       | Imp  | 0.99           |
| rs12522626      | 44685698 | G   | T    | 0.41 | 1.09       | 2.67E-19       | 1.12   | 1.73E-22   | 1.01   | 0.69       | Gen  | 1.00           |
| rs10805686      | 44662128 | T   | C    | 0.41 | 1.09       | 2.95E-19       | 1.12   | 2.24E-22   | 1.01   | 0.76       | Gen  | 1.00           |
| rs6890556       | 44648666 | C   | G    | 0.41 | 1.09       | 3.01E-19       | 1.12   | 3.17E-22   | 1.01   | 0.76       | Gen  | 1.00           |
| rs2165010       | 44706780 | A   | C    | 0.41 | 1.09       | 3.12E-19       | 1.12   | 1.68E-22   | 1.01   | 0.68       | Imp  | 0.99           |
| rs13176502      | 44697908 | T   | C    | 0.41 | 1.09       | 3.36E-19       | 1.12   | 2.17E-22   | 1.01   | 0.66       | Imp  | 0.99           |
| rs714130        | 44701418 | T   | C    | 0.41 | 1.09       | 3.55E-19       | 1.12   | 2.03E-22   | 1.01   | 0.68       | Gen  | 1.00           |
| rs1438825       | 44706931 | G   | A    | 0.41 | 1.09       | 3.58E-19       | 1.12   | 1.63E-22   | 1.01   | 0.72       | Gen  | 1.00           |
| rs10941677      | 44662399 | G   | A    | 0.41 | 1.09       | 3.64E-19       | 1.12   | 2.24E-22   | 1.01   | 0.77       | Gen  | 1.00           |
| rs1371027       | 44699857 | T   | C    | 0.41 | 1.09       | 3.65E-19       | 1.12   | 1.90E-22   | 1.01   | 0.69       | Gen  | 1.00           |
| rs2218081       | 44705140 | C   | T    | 0.41 | 1.09       | 3.76E-19       | 1.12   | 1.50E-22   | 1.01   | 0.74       | Gen  | 1.00           |
| rs4415084       | 44662515 | C   | T    | 0.41 | 1.09       | 3.81E-19       | 1.12   | 2.67E-22   | 1.01   | 0.78       | Gen  | 1.00           |

|                 |          |         |    |      |      |          |      |          |      |      |     |      |
|-----------------|----------|---------|----|------|------|----------|------|----------|------|------|-----|------|
| rs1898701       | 44695429 | A       | G  | 0.41 | 1.09 | 3.87E-19 | 1.12 | 2.53E-22 | 1.01 | 0.67 | Imp | 0.99 |
| rs2165009       | 44697916 | C       | T  | 0.41 | 1.09 | 4.09E-19 | 1.12 | 1.53E-22 | 1.01 | 0.72 | Gen | 0.99 |
| rs4415085       | 44662959 | C       | G  | 0.41 | 1.09 | 4.21E-19 | 1.12 | 2.45E-22 | 1.00 | 0.82 | Gen | 1.00 |
| rs6871484       | 44676305 | T       | C  | 0.41 | 1.09 | 4.24E-19 | 1.12 | 2.26E-22 | 1.01 | 0.75 | Imp | 0.99 |
| rs920329        | 44702507 | T       | C  | 0.41 | 1.09 | 4.54E-19 | 1.12 | 1.71E-22 | 1.01 | 0.75 | Gen | 1.00 |
| rs6863598       | 44668623 | C       | T  | 0.41 | 1.09 | 4.62E-19 | 1.12 | 2.67E-22 | 1.01 | 0.76 | Imp | 0.98 |
| rs4419600       | 44678534 | T       | G  | 0.41 | 1.09 | 4.72E-19 | 1.12 | 4.27E-22 | 1.01 | 0.74 | Gen | 1.00 |
| rs34762678      | 44705514 | T       | C  | 0.41 | 1.09 | 4.75E-19 | 1.12 | 2.22E-22 | 1.01 | 0.67 | Gen | 1.00 |
| rs4571480       | 44687188 | C       | T  | 0.41 | 1.09 | 4.85E-19 | 1.12 | 1.64E-22 | 1.01 | 0.77 | Gen | 1.00 |
| rs13156930      | 44698035 | G       | C  | 0.41 | 1.09 | 4.92E-19 | 1.12 | 1.76E-22 | 1.01 | 0.75 | Gen | 1.00 |
| c5_pos44711954  | 44676197 | C       | T  | 0.41 | 1.09 | 5.20E-19 | 1.12 | 3.06E-22 | 1.00 | 0.80 | Gen | 1.00 |
| chr5:44637587:I | 44637587 | T       | TC | 0.40 | 1.09 | 5.28E-19 | 1.12 | 2.86E-22 | 1.00 | 0.87 | Imp | 0.97 |
| chr5:44929230:D | 44929230 | ATAATAT | A  | 0.60 | 0.91 | 5.60E-19 | 0.89 | 4.32E-21 | 0.98 | 0.44 | Imp | 0.92 |
| rs10462079      | 44700110 | G       | T  | 0.41 | 1.09 | 5.77E-19 | 1.12 | 3.09E-22 | 1.01 | 0.69 | Gen | 0.99 |
| chr5:44678911:D | 44678911 | TA      | T  | 0.40 | 1.09 | 5.83E-19 | 1.12 | 3.22E-22 | 1.01 | 0.79 | Imp | 0.97 |
| rs2218080       | 44714330 | T       | C  | 0.42 | 1.09 | 5.99E-19 | 1.12 | 2.50E-22 | 1.01 | 0.76 | Imp | 0.96 |
| rs2013513       | 44702306 | G       | A  | 0.41 | 1.09 | 6.02E-19 | 1.12 | 3.39E-22 | 1.01 | 0.68 | Imp | 0.99 |
| rs13179137      | 44702692 | C       | T  | 0.41 | 1.09 | 6.55E-19 | 1.12 | 2.82E-22 | 1.01 | 0.69 | Gen | 1.00 |
| rs7720551       | 44664477 | C       | T  | 0.41 | 1.09 | 7.05E-19 | 1.12 | 4.87E-22 | 1.00 | 0.81 | Imp | 0.99 |
| rs10941678      | 44672783 | C       | A  | 0.38 | 1.1  | 7.18E-19 | 1.13 | 7.22E-22 | 1.00 | 0.98 | Imp | 0.89 |
| rs4607355       | 44868070 | A       | G  | 0.52 | 0.91 | 7.56E-19 | 0.89 | 3.46E-20 | 0.97 | 0.12 | Imp | 0.84 |
| rs144629423     | 44669403 | G       | T  | 0.41 | 1.09 | 8.10E-19 | 1.12 | 4.28E-22 | 1.01 | 0.75 | Imp | 0.97 |
| rs6884702       | 44682589 | A       | G  | 0.40 | 1.09 | 8.55E-19 | 1.12 | 3.18E-22 | 1.01 | 0.75 | Imp | 0.99 |
| rs7723539       | 44660210 | G       | C  | 0.41 | 1.09 | 8.60E-19 | 1.12 | 5.63E-22 | 1.00 | 0.84 | Imp | 0.99 |
| rs10805685      | 44661958 | C       | G  | 0.41 | 1.09 | 9.02E-19 | 1.12 | 5.83E-22 | 1.00 | 0.84 | Imp | 0.99 |
| rs4571481       | 44687433 | C       | T  | 0.39 | 1.09 | 9.77E-19 | 1.11 | 4.21E-21 | 1.03 | 0.19 | Gen | 0.95 |
| rs12515012      | 44694535 | G       | A  | 0.40 | 1.09 | 9.84E-19 | 1.12 | 4.89E-22 | 1.01 | 0.75 | Imp | 0.98 |
| rs181516187     | 44672104 | C       | T  | 0.40 | 1.09 | 1.11E-18 | 1.12 | 6.79E-22 | 1.00 | 0.82 | Imp | 0.97 |
| rs16901937      | 44709141 | A       | G  | 0.41 | 1.09 | 1.71E-18 | 1.12 | 7.12E-22 | 1.01 | 0.79 | Gen | 1.00 |
| rs7701466       | 44663137 | C       | T  | 0.40 | 1.09 | 3.42E-18 | 1.12 | 1.08E-21 | 1.00 | 1.00 | Imp | 0.97 |
| rs11949847      | 44752169 | A       | G  | 0.42 | 1.09 | 3.92E-18 | 1.11 | 1.08E-20 | 1.00 | 0.81 | Gen | 0.99 |
| c5_pos44685154  | 44649397 | A       | C  | 0.38 | 1.09 | 4.42E-18 | 1.11 | 1.23E-20 | 1.02 | 0.32 | Gen | 0.98 |
| rs56248730      | 44681267 | A       | G  | 0.38 | 1.09 | 4.64E-18 | 1.12 | 9.44E-21 | 1.02 | 0.32 | Imp | 0.98 |
| c5_pos44720000  | 44684243 | A       | G  | 0.38 | 1.09 | 4.65E-18 | 1.12 | 8.11E-21 | 1.02 | 0.32 | Gen | 1.00 |
| rs6867533       | 44827292 | G       | T  | 0.40 | 1.09 | 5.17E-18 | 1.11 | 2.05E-20 | 1.00 | 0.84 | Gen | 0.96 |
| rs994793        | 44743247 | A       | G  | 0.42 | 1.09 | 5.41E-18 | 1.11 | 1.04E-20 | 1.00 | 0.82 | Gen | 1.00 |
| rs920328        | 44699051 | G       | A  | 0.38 | 1.09 | 6.04E-18 | 1.12 | 7.48E-21 | 1.02 | 0.31 | Gen | 1.00 |
| rs11746980      | 44777878 | G       | A  | 0.42 | 1.09 | 6.64E-18 | 1.11 | 2.04E-20 | 1.00 | 0.80 | Gen | 1.00 |
| rs2330572       | 44740989 | A       | C  | 0.42 | 1.09 | 7.56E-18 | 1.11 | 1.25E-20 | 1.00 | 0.84 | Gen | 1.00 |
| rs7737491       | 44790842 | A       | G  | 0.37 | 1.09 | 8.66E-18 | 1.11 | 4.58E-19 | 1.03 | 0.20 | Imp | 0.96 |
| rs10447145      | 44689796 | T       | G  | 0.38 | 1.09 | 8.76E-18 | 1.11 | 1.33E-20 | 1.02 | 0.34 | Imp | 0.98 |

|                 |          |       |    |      |      |          |      |          |      |      |     |      |
|-----------------|----------|-------|----|------|------|----------|------|----------|------|------|-----|------|
| rs145342568     | 44672237 | A     | G  | 0.39 | 1.09 | 1.00E-17 | 1.12 | 8.13E-21 | 1.01 | 0.69 | Imp | 0.91 |
| rs13160259      | 44828964 | G     | C  | 0.42 | 1.09 | 1.17E-17 | 1.11 | 5.45E-20 | 1.01 | 0.77 | Imp | 0.98 |
| rs10072259      | 44834791 | T     | C  | 0.61 | 0.92 | 1.22E-17 | 0.90 | 1.39E-19 | 0.98 | 0.35 | Imp | 0.98 |
| rs10512865      | 44823367 | C     | T  | 0.41 | 1.09 | 1.27E-17 | 1.11 | 6.61E-20 | 1.01 | 0.77 | Imp | 0.99 |
| rs11958808      | 44945090 | G     | C  | 0.41 | 1.09 | 1.36E-17 | 1.11 | 1.25E-19 | 1.01 | 0.76 | Gen | 1.00 |
| rs4866922       | 44932505 | C     | G  | 0.59 | 0.92 | 1.41E-17 | 0.90 | 1.11E-19 | 0.99 | 0.72 | Imp | 0.99 |
| chr5:44837254:l | 44837254 | T     | TA | 0.58 | 0.92 | 1.43E-17 | 0.90 | 7.54E-20 | 0.99 | 0.77 | Imp | 0.99 |
| rs1048758       | 44828594 | G     | A  | 0.41 | 1.09 | 1.43E-17 | 1.11 | 6.71E-20 | 1.00 | 0.80 | Gen | 1.00 |
| rs1371023       | 44846575 | C     | T  | 0.59 | 0.92 | 1.52E-17 | 0.90 | 8.79E-20 | 1.00 | 0.79 | Gen | 1.00 |
| rs10054773      | 44930234 | C     | G  | 0.59 | 0.92 | 1.54E-17 | 0.90 | 1.30E-19 | 0.99 | 0.71 | Imp | 0.98 |
| rs10044096      | 44927365 | A     | C  | 0.59 | 0.92 | 1.55E-17 | 0.90 | 1.49E-19 | 0.99 | 0.71 | Imp | 0.99 |
| rs7716571       | 44816984 | G     | A  | 0.42 | 1.09 | 1.62E-17 | 1.11 | 1.20E-19 | 1.01 | 0.78 | Gen | 0.96 |
| chr5:44884873:D | 44884873 | TAAAC | T  | 0.58 | 0.92 | 1.73E-17 | 0.90 | 1.36E-19 | 0.99 | 0.73 | Imp | 0.98 |
| rs2118764       | 44787723 | C     | T  | 0.41 | 1.09 | 1.77E-17 | 1.11 | 1.40E-19 | 1.00 | 0.80 | Imp | 0.98 |
| rs10064434      | 44834702 | G     | A  | 0.58 | 0.92 | 1.81E-17 | 0.90 | 7.93E-20 | 1.00 | 0.81 | Imp | 0.98 |
| rs930396        | 44856451 | T     | G  | 0.59 | 0.92 | 1.89E-17 | 0.90 | 1.58E-19 | 0.99 | 0.79 | Gen | 1.00 |
| rs7380559       | 44837010 | A     | T  | 0.59 | 0.92 | 1.91E-17 | 0.90 | 1.02E-19 | 1.00 | 0.80 | Gen | 1.00 |
| rs1821934       | 44789172 | T     | C  | 0.41 | 1.09 | 1.91E-17 | 1.11 | 1.63E-19 | 1.01 | 0.74 | Imp | 0.98 |
| rs7711697       | 44780403 | A     | T  | 0.41 | 1.09 | 1.95E-17 | 1.11 | 1.24E-19 | 1.00 | 0.82 | Gen | 1.00 |
| rs7711136       | 44823079 | G     | C  | 0.41 | 1.09 | 1.96E-17 | 1.11 | 1.10E-19 | 1.00 | 0.79 | Gen | 0.99 |
| rs1438820       | 44797770 | G     | A  | 0.41 | 1.09 | 2.03E-17 | 1.11 | 1.20E-19 | 1.00 | 0.84 | Gen | 1.00 |
| rs4866923       | 44932641 | A     | C  | 0.58 | 0.92 | 2.07E-17 | 0.90 | 2.19E-19 | 0.99 | 0.74 | Imp | 0.97 |
| rs6896417       | 44802638 | A     | G  | 0.41 | 1.09 | 2.15E-17 | 1.11 | 1.56E-19 | 1.00 | 0.84 | Gen | 1.00 |
| rs1061310       | 44820850 | G     | C  | 0.41 | 1.09 | 2.15E-17 | 1.11 | 1.16E-19 | 1.01 | 0.79 | Gen | 1.00 |
| rs1438821       | 44858451 | G     | A  | 0.59 | 0.92 | 2.17E-17 | 0.90 | 1.82E-19 | 1.00 | 0.80 | Gen | 1.00 |
| rs13177711      | 44796962 | A     | T  | 0.41 | 1.09 | 2.23E-17 | 1.11 | 1.69E-19 | 1.00 | 0.83 | Gen | 0.99 |
| rs4629607       | 44857467 | G     | T  | 0.58 | 0.92 | 2.23E-17 | 0.90 | 6.97E-18 | 0.97 | 0.11 | Imp | 0.90 |
| rs13159598      | 44805926 | A     | G  | 0.41 | 1.09 | 2.27E-17 | 1.11 | 1.61E-19 | 1.00 | 0.83 | Gen | 1.00 |
| rs7730841       | 44823134 | T     | C  | 0.42 | 1.09 | 2.32E-17 | 1.11 | 1.24E-19 | 1.00 | 0.80 | Gen | 0.98 |
| rs13362132      | 44858260 | T     | G  | 0.59 | 0.92 | 2.54E-17 | 0.90 | 2.03E-19 | 1.00 | 0.79 | Gen | 1.00 |
| rs10043344      | 44926518 | A     | T  | 0.59 | 0.92 | 2.57E-17 | 0.90 | 1.50E-19 | 0.99 | 0.76 | Gen | 1.00 |
| rs187822318     | 44671468 | C     | G  | 0.35 | 1.1  | 2.71E-17 | 1.12 | 2.72E-19 | 1.02 | 0.28 | Imp | 0.84 |
| rs7720787       | 44817309 | G     | A  | 0.41 | 1.09 | 2.88E-17 | 1.11 | 1.52E-19 | 1.00 | 0.82 | Gen | 1.00 |
| rs7705343       | 44879577 | G     | A  | 0.59 | 0.92 | 3.06E-17 | 0.90 | 2.70E-19 | 0.99 | 0.79 | Gen | 1.00 |
| rs149708574     | 44825919 | T     | A  | 0.30 | 1.1  | 3.10E-17 | 1.12 | 2.35E-18 | 1.04 | 0.07 | Imp | 0.84 |
| rs2877172       | 44790567 | A     | G  | 0.41 | 1.09 | 3.13E-17 | 1.11 | 2.26E-19 | 1.00 | 0.83 | Imp | 0.97 |
| rs4518409       | 44870852 | T     | C  | 0.59 | 0.92 | 3.18E-17 | 0.90 | 2.75E-19 | 1.00 | 0.83 | Gen | 1.00 |
| rs10077814      | 44916789 | C     | T  | 0.59 | 0.92 | 3.39E-17 | 0.90 | 1.88E-19 | 1.00 | 0.80 | Gen | 1.00 |
| rs4329028       | 44872353 | T     | A  | 0.59 | 0.92 | 3.64E-17 | 0.90 | 4.23E-19 | 0.99 | 0.76 | Gen | 1.00 |
| chr5:44921964:l | 44921964 | A     | AT | 0.59 | 0.92 | 4.14E-17 | 0.90 | 3.42E-19 | 0.99 | 0.78 | Imp | 0.96 |
| c5_pos44933593  | 44897836 | T     | C  | 0.59 | 0.92 | 4.45E-17 | 0.90 | 2.78E-19 | 0.99 | 0.78 | Gen | 0.99 |

|                 |          |        |   |      |      |          |      |          |      |      |     |      |
|-----------------|----------|--------|---|------|------|----------|------|----------|------|------|-----|------|
| rs9292915       | 44871657 | C      | T | 0.59 | 0.92 | 4.49E-17 | 0.90 | 4.55E-19 | 0.99 | 0.78 | Gen | 1.00 |
| rs9292913       | 44870879 | G      | A | 0.59 | 0.92 | 4.63E-17 | 0.90 | 4.50E-19 | 1.00 | 0.80 | Gen | 1.00 |
| rs4412123       | 44876288 | T      | C | 0.59 | 0.92 | 4.79E-17 | 0.90 | 4.15E-19 | 1.00 | 0.86 | Gen | 1.00 |
| rs9790896       | 44900091 | G      | A | 0.59 | 0.92 | 5.21E-17 | 0.90 | 2.76E-19 | 1.00 | 0.86 | Gen | 1.00 |
| chr5:44818855:D | 44818855 | CCAA   | C | 0.38 | 1.09 | 5.37E-17 | 1.11 | 1.48E-18 | 1.02 | 0.26 | Imp | 0.99 |
| rs9790879       | 44899885 | C      | T | 0.59 | 0.92 | 5.65E-17 | 0.90 | 2.82E-19 | 1.00 | 0.86 | Gen | 1.00 |
| rs11957920      | 44905086 | T      | C | 0.59 | 0.92 | 5.72E-17 | 0.90 | 4.80E-19 | 1.00 | 0.86 | Gen | 1.00 |
| rs10070339      | 44907882 | G      | A | 0.59 | 0.92 | 6.40E-17 | 0.90 | 4.39E-19 | 1.00 | 0.90 | Gen | 1.00 |
| rs7726586       | 44848822 | C      | T | 0.62 | 0.92 | 9.03E-17 | 0.90 | 1.89E-18 | 0.98 | 0.33 | Gen | 1.00 |
| rs13154781      | 44775027 | C      | T | 0.39 | 1.09 | 9.35E-17 | 1.11 | 9.73E-19 | 1.02 | 0.35 | Imp | 0.99 |
| rs1438827       | 44751956 | C      | A | 0.39 | 1.09 | 9.41E-17 | 1.11 | 7.00E-19 | 1.02 | 0.35 | Gen | 1.00 |
| rs7712949       | 44770345 | C      | T | 0.39 | 1.09 | 9.90E-17 | 1.11 | 7.94E-19 | 1.02 | 0.37 | Gen | 1.00 |
| chr5:44810239:D | 44810239 | TG     | T | 0.41 | 1.09 | 1.01E-16 | 1.11 | 6.06E-19 | 1.01 | 0.74 | Imp | 0.96 |
| rs7708213       | 44848401 | T      | C | 0.62 | 0.92 | 1.03E-16 | 0.90 | 2.52E-18 | 0.98 | 0.30 | Gen | 1.00 |
| rs34237302      | 44852862 | C      | A | 0.61 | 0.92 | 1.04E-16 | 0.90 | 2.61E-18 | 0.98 | 0.29 | Gen | 0.99 |
| rs4440370       | 44853352 | A      | G | 0.62 | 0.92 | 1.10E-16 | 0.90 | 2.63E-18 | 0.98 | 0.31 | Gen | 1.00 |
| rs11747159      | 44737710 | C      | T | 0.39 | 1.09 | 1.12E-16 | 1.11 | 1.12E-18 | 1.02 | 0.34 | Gen | 1.00 |
| rs4492119       | 44855614 | A      | G | 0.61 | 0.92 | 1.37E-16 | 0.90 | 2.83E-18 | 0.98 | 0.33 | Gen | 0.98 |
| rs1371022       | 44847992 | T      | A | 0.62 | 0.92 | 1.42E-16 | 0.90 | 3.56E-18 | 0.98 | 0.32 | Gen | 1.00 |
| rs987394        | 44846378 | A      | G | 0.62 | 0.92 | 1.49E-16 | 0.90 | 3.64E-18 | 0.98 | 0.31 | Gen | 1.00 |
| rs10462081      | 44800665 | G      | A | 0.38 | 1.09 | 1.58E-16 | 1.11 | 4.22E-18 | 1.02 | 0.33 | Gen | 1.00 |
| rs1438819       | 44797846 | T      | A | 0.38 | 1.09 | 1.60E-16 | 1.11 | 4.54E-18 | 1.02 | 0.34 | Gen | 1.00 |
| rs7715731       | 44846844 | A      | C | 0.62 | 0.92 | 1.69E-16 | 0.90 | 3.01E-18 | 0.98 | 0.33 | Gen | 1.00 |
| rs1371025       | 44834233 | G      | A | 0.62 | 0.92 | 1.70E-16 | 0.90 | 3.46E-18 | 0.98 | 0.32 | Gen | 0.99 |
| rs1866406       | 44809945 | G      | C | 0.39 | 1.09 | 1.74E-16 | 1.11 | 4.31E-18 | 1.02 | 0.32 | Gen | 0.99 |
| rs9637797       | 44818181 | A      | G | 0.39 | 1.09 | 1.74E-16 | 1.11 | 3.90E-18 | 1.02 | 0.32 | Gen | 1.00 |
| rs930394        | 44822617 | G      | A | 0.38 | 1.09 | 1.83E-16 | 1.11 | 3.68E-18 | 1.02 | 0.32 | Gen | 1.00 |
| rs3761650       | 44808356 | G      | A | 0.38 | 1.09 | 1.83E-16 | 1.11 | 4.39E-18 | 1.02 | 0.33 | Gen | 1.00 |
| rs6451781       | 44860506 | T      | C | 0.61 | 0.92 | 1.86E-16 | 0.90 | 6.29E-18 | 0.98 | 0.31 | Gen | 1.00 |
| rs10462080      | 44799052 | C      | A | 0.38 | 1.09 | 1.90E-16 | 1.11 | 5.95E-18 | 1.02 | 0.34 | Imp | 0.98 |
| rs71610376      | 44825023 | G      | C | 0.38 | 1.09 | 1.92E-16 | 1.11 | 3.97E-18 | 1.02 | 0.33 | Imp | 0.99 |
| rs12517690      | 44939293 | G      | A | 0.39 | 1.09 | 1.93E-16 | 1.11 | 5.48E-18 | 1.02 | 0.32 | Gen | 1.00 |
| chr5:44816067:D | 44816067 | TAAAAG | T | 0.38 | 1.09 | 1.96E-16 | 1.11 | 4.43E-18 | 1.02 | 0.33 | Imp | 0.99 |
| rs727305        | 44796042 | T      | C | 0.39 | 1.09 | 1.97E-16 | 1.11 | 4.67E-18 | 1.02 | 0.35 | Gen | 0.99 |
| rs7703497       | 44857028 | A      | G | 0.61 | 0.92 | 1.97E-16 | 0.90 | 5.87E-18 | 0.98 | 0.34 | Gen | 1.00 |
| rs4457089       | 44821736 | C      | T | 0.38 | 1.09 | 2.02E-16 | 1.11 | 4.19E-18 | 1.02 | 0.32 | Gen | 1.00 |
| rs1371024       | 44843590 | C      | T | 0.61 | 0.92 | 2.04E-16 | 0.90 | 4.26E-18 | 0.98 | 0.32 | Gen | 1.00 |
| rs727304        | 44796290 | G      | A | 0.38 | 1.09 | 2.05E-16 | 1.11 | 5.92E-18 | 1.02 | 0.34 | Gen | 1.00 |
| rs10038562      | 44832226 | C      | T | 0.61 | 0.92 | 2.05E-16 | 0.90 | 4.15E-18 | 0.98 | 0.32 | Gen | 0.99 |
| rs13174122      | 44810740 | T      | C | 0.39 | 1.09 | 2.06E-16 | 1.11 | 4.57E-18 | 1.02 | 0.32 | Gen | 0.99 |
| rs7703059       | 44826436 | G      | A | 0.38 | 1.09 | 2.06E-16 | 1.11 | 4.34E-18 | 1.02 | 0.34 | Imp | 0.99 |

|            |          |   |   |      |      |          |      |          |      |      |     |      |
|------------|----------|---|---|------|------|----------|------|----------|------|------|-----|------|
| rs2165008  | 44821679 | G | A | 0.38 | 1.09 | 2.08E-16 | 1.11 | 4.35E-18 | 1.02 | 0.32 | Gen | 1.00 |
| rs7717459  | 44804525 | C | T | 0.38 | 1.09 | 2.12E-16 | 1.11 | 5.66E-18 | 1.02 | 0.34 | Gen | 1.00 |
| rs4298259  | 44920711 | G | A | 0.61 | 0.92 | 2.12E-16 | 0.90 | 4.29E-18 | 0.98 | 0.33 | Gen | 1.00 |
| rs11746506 | 44812566 | C | T | 0.38 | 1.09 | 2.13E-16 | 1.11 | 4.36E-18 | 1.02 | 0.32 | Gen | 1.00 |
| rs12513749 | 44828203 | G | A | 0.39 | 1.09 | 2.16E-16 | 1.11 | 4.46E-18 | 1.02 | 0.34 | Imp | 0.99 |
| rs13189120 | 44822283 | A | T | 0.39 | 1.09 | 2.17E-16 | 1.11 | 4.55E-18 | 1.02 | 0.32 | Gen | 1.00 |
| rs6868232  | 44827680 | G | C | 0.38 | 1.09 | 2.18E-16 | 1.11 | 4.19E-18 | 1.02 | 0.34 | Imp | 0.99 |
| rs16901989 | 44837129 | C | T | 0.61 | 0.92 | 2.18E-16 | 0.90 | 4.61E-18 | 0.98 | 0.32 | Gen | 1.00 |
| rs13155698 | 44828681 | A | C | 0.39 | 1.09 | 2.18E-16 | 1.11 | 3.97E-18 | 1.02 | 0.33 | Gen | 1.00 |
| rs6896350  | 44832571 | C | A | 0.61 | 0.92 | 2.19E-16 | 0.90 | 4.25E-18 | 0.98 | 0.33 | Gen | 1.00 |
| rs1438822  | 44859172 | C | G | 0.61 | 0.92 | 2.21E-16 | 0.90 | 7.25E-18 | 0.98 | 0.32 | Gen | 1.00 |
| rs729599   | 44842260 | G | A | 0.62 | 0.92 | 2.23E-16 | 0.90 | 3.96E-18 | 0.98 | 0.33 | Imp | 0.99 |
| rs6451772  | 44785763 | A | C | 0.39 | 1.09 | 2.24E-16 | 1.11 | 6.13E-18 | 1.02 | 0.37 | Imp | 0.98 |
| rs6872254  | 44803784 | C | T | 0.39 | 1.09 | 2.28E-16 | 1.11 | 6.90E-18 | 1.02 | 0.34 | Gen | 0.99 |
| rs1837286  | 44858741 | C | T | 0.62 | 0.92 | 2.28E-16 | 0.90 | 6.49E-18 | 0.98 | 0.32 | Imp | 0.99 |
| rs4373287  | 44862884 | G | T | 0.61 | 0.92 | 2.28E-16 | 0.90 | 7.68E-18 | 0.98 | 0.33 | Imp | 0.99 |
| rs11741772 | 44814597 | A | C | 0.38 | 1.09 | 2.29E-16 | 1.11 | 5.23E-18 | 1.02 | 0.33 | Imp | 0.99 |
| rs3761648  | 44808079 | A | G | 0.38 | 1.09 | 2.31E-16 | 1.11 | 5.47E-18 | 1.02 | 0.34 | Imp | 0.99 |
| rs16901964 | 44783255 | C | T | 0.38 | 1.09 | 2.33E-16 | 1.11 | 5.86E-18 | 1.02 | 0.35 | Gen | 1.00 |
| rs12651949 | 44798112 | C | T | 0.38 | 1.09 | 2.33E-16 | 1.11 | 6.20E-18 | 1.02 | 0.34 | Gen | 1.00 |
| rs10462083 | 44806737 | T | G | 0.38 | 1.09 | 2.33E-16 | 1.11 | 5.65E-18 | 1.02 | 0.35 | Imp | 0.99 |
| rs4596389  | 44836556 | A | C | 0.62 | 0.92 | 2.35E-16 | 0.90 | 3.59E-18 | 0.98 | 0.33 | Gen | 1.00 |
| rs969679   | 44804052 | T | C | 0.38 | 1.09 | 2.35E-16 | 1.11 | 5.95E-18 | 1.02 | 0.34 | Imp | 0.99 |
| rs16901990 | 44842740 | A | C | 0.62 | 0.92 | 2.35E-16 | 0.90 | 3.54E-18 | 0.98 | 0.33 | Gen | 1.00 |
| rs7707315  | 44918805 | T | C | 0.61 | 0.92 | 2.38E-16 | 0.90 | 4.48E-18 | 0.98 | 0.35 | Gen | 1.00 |
| rs16901965 | 44783358 | G | A | 0.38 | 1.09 | 2.39E-16 | 1.11 | 5.51E-18 | 1.02 | 0.35 | Gen | 1.00 |
| rs3761649  | 44808164 | T | C | 0.38 | 1.09 | 2.40E-16 | 1.11 | 5.60E-18 | 1.02 | 0.34 | Imp | 0.99 |
| rs16901963 | 44783102 | T | A | 0.39 | 1.09 | 2.40E-16 | 1.11 | 5.55E-18 | 1.02 | 0.35 | Gen | 1.00 |
| rs6451775  | 44836788 | G | A | 0.62 | 0.92 | 2.41E-16 | 0.90 | 4.60E-18 | 0.98 | 0.33 | Imp | 0.99 |
| rs12518851 | 44828231 | A | G | 0.38 | 1.09 | 2.44E-16 | 1.11 | 4.45E-18 | 1.02 | 0.34 | Imp | 0.99 |
| rs9637796  | 44817919 | G | A | 0.38 | 1.09 | 2.45E-16 | 1.11 | 5.69E-18 | 1.02 | 0.33 | Imp | 0.99 |
| rs7736952  | 44790379 | C | T | 0.39 | 1.09 | 2.49E-16 | 1.11 | 6.96E-18 | 1.02 | 0.35 | Imp | 0.99 |
| rs6451783  | 44918293 | G | A | 0.61 | 0.92 | 2.51E-16 | 0.90 | 4.43E-18 | 0.98 | 0.35 | Gen | 1.00 |
| rs6893319  | 44863729 | T | G | 0.62 | 0.92 | 2.53E-16 | 0.90 | 7.70E-18 | 0.98 | 0.34 | Imp | 0.99 |
| rs2083243  | 44840147 | C | T | 0.62 | 0.92 | 2.55E-16 | 0.90 | 4.35E-18 | 0.98 | 0.33 | Imp | 0.99 |
| rs12188871 | 44814004 | G | A | 0.39 | 1.09 | 2.55E-16 | 1.11 | 5.73E-18 | 1.02 | 0.32 | Gen | 1.00 |
| rs13185174 | 44791791 | G | A | 0.38 | 1.09 | 2.56E-16 | 1.11 | 5.98E-18 | 1.02 | 0.36 | Imp | 0.98 |
| rs10041518 | 44927406 | T | C | 0.61 | 0.92 | 2.57E-16 | 0.90 | 6.23E-18 | 0.98 | 0.34 | Gen | 1.00 |
| rs2330620  | 44839822 | G | A | 0.62 | 0.92 | 2.58E-16 | 0.90 | 4.62E-18 | 0.98 | 0.33 | Imp | 0.99 |
| rs4604199  | 44855716 | T | C | 0.62 | 0.92 | 2.59E-16 | 0.90 | 6.78E-18 | 0.98 | 0.34 | Imp | 0.99 |
| rs4605791  | 44855712 | T | G | 0.62 | 0.92 | 2.60E-16 | 0.90 | 6.78E-18 | 0.98 | 0.34 | Imp | 0.99 |

|                 |          |        |    |      |      |          |      |          |      |      |     |      |
|-----------------|----------|--------|----|------|------|----------|------|----------|------|------|-----|------|
| rs1837285       | 44858490 | T      | G  | 0.62 | 0.92 | 2.60E-16 | 0.90 | 6.52E-18 | 0.98 | 0.33 | Imp | 0.99 |
| rs3747479       | 44809162 | G      | C  | 0.39 | 1.09 | 2.60E-16 | 1.11 | 5.48E-18 | 1.02 | 0.34 | Gen | 1.00 |
| rs6871052       | 44863317 | C      | T  | 0.62 | 0.92 | 2.63E-16 | 0.90 | 7.44E-18 | 0.98 | 0.34 | Gen | 1.00 |
| rs6451784       | 44922331 | A      | G  | 0.58 | 0.92 | 2.63E-16 | 0.90 | 3.17E-18 | 0.98 | 0.34 | Imp | 0.90 |
| rs7728431       | 44922679 | T      | C  | 0.61 | 0.92 | 2.65E-16 | 0.90 | 5.40E-18 | 0.98 | 0.34 | Gen | 1.00 |
| rs4566804       | 44855739 | T      | C  | 0.62 | 0.92 | 2.66E-16 | 0.90 | 6.87E-18 | 0.98 | 0.34 | Imp | 0.99 |
| rs7736092       | 44920995 | C      | T  | 0.61 | 0.92 | 2.66E-16 | 0.90 | 5.15E-18 | 0.98 | 0.33 | Gen | 1.00 |
| rs10064437      | 44834721 | G      | C  | 0.61 | 0.92 | 2.69E-16 | 0.90 | 3.66E-18 | 0.98 | 0.37 | Imp | 0.98 |
| rs10070928      | 44888557 | C      | G  | 0.60 | 0.92 | 2.72E-16 | 0.91 | 9.63E-18 | 0.98 | 0.31 | Gen | 0.96 |
| rs7710952       | 44785791 | C      | T  | 0.38 | 1.09 | 2.74E-16 | 1.11 | 7.59E-18 | 1.02 | 0.35 | Imp | 0.99 |
| rs7710978       | 44785864 | A      | G  | 0.38 | 1.09 | 2.75E-16 | 1.11 | 7.62E-18 | 1.02 | 0.35 | Imp | 0.99 |
| rs10053247      | 44863959 | C      | T  | 0.62 | 0.92 | 2.78E-16 | 0.90 | 8.60E-18 | 0.98 | 0.34 | Imp | 0.99 |
| rs12656984      | 44824702 | A      | G  | 0.38 | 1.09 | 2.79E-16 | 1.11 | 6.67E-18 | 1.02 | 0.32 | Imp | 0.98 |
| rs7703618       | 44914579 | G      | A  | 0.61 | 0.92 | 2.83E-16 | 0.90 | 7.58E-18 | 0.98 | 0.34 | Gen | 1.00 |
| rs10044321      | 44890760 | G      | A  | 0.61 | 0.92 | 2.85E-16 | 0.91 | 8.30E-18 | 0.98 | 0.35 | Imp | 0.99 |
| rs10073945      | 44932134 | A      | G  | 0.61 | 0.92 | 2.86E-16 | 0.90 | 6.86E-18 | 0.98 | 0.35 | Imp | 0.99 |
| chr5:44916609:D | 44916609 | GT     | G  | 0.63 | 0.92 | 2.92E-16 | 0.90 | 4.50E-18 | 0.98 | 0.33 | Imp | 0.96 |
| rs13179835      | 44908703 | G      | A  | 0.61 | 0.92 | 2.94E-16 | 0.90 | 5.90E-18 | 0.99 | 0.45 | Imp | 0.97 |
| rs6871820       | 44919557 | T      | C  | 0.61 | 0.92 | 2.99E-16 | 0.90 | 6.36E-18 | 0.98 | 0.33 | Gen | 0.99 |
| rs10038554      | 44927107 | G      | A  | 0.61 | 0.92 | 2.99E-16 | 0.90 | 6.52E-18 | 0.98 | 0.34 | Gen | 1.00 |
| rs34325259      | 44936860 | G      | T  | 0.38 | 1.08 | 3.02E-16 | 1.10 | 9.54E-18 | 1.02 | 0.42 | Gen | 0.96 |
| rs13183209      | 44803749 | G      | A  | 0.38 | 1.09 | 3.04E-16 | 1.11 | 7.72E-18 | 1.02 | 0.35 | Imp | 0.99 |
| rs6451774       | 44793984 | G      | C  | 0.38 | 1.09 | 3.04E-16 | 1.10 | 8.79E-18 | 1.02 | 0.35 | Imp | 0.99 |
| rs10063172      | 44930709 | T      | C  | 0.61 | 0.92 | 3.11E-16 | 0.90 | 7.55E-18 | 0.98 | 0.35 | Imp | 0.99 |
| rs6451778       | 44857988 | C      | T  | 0.62 | 0.92 | 3.12E-16 | 0.90 | 8.11E-18 | 0.98 | 0.34 | Imp | 0.99 |
| rs10039866      | 44925061 | T      | A  | 0.61 | 0.92 | 3.13E-16 | 0.90 | 5.21E-18 | 0.98 | 0.35 | Gen | 1.00 |
| rs11948636      | 44881229 | A      | C  | 0.61 | 0.92 | 3.15E-16 | 0.91 | 1.00E-17 | 0.98 | 0.34 | Gen | 1.00 |
| rs34115673      | 44892801 | T      | G  | 0.61 | 0.92 | 3.20E-16 | 0.91 | 8.96E-18 | 0.98 | 0.36 | Imp | 0.98 |
| rs10035358      | 44892902 | C      | A  | 0.61 | 0.92 | 3.21E-16 | 0.91 | 8.71E-18 | 0.98 | 0.36 | Imp | 0.98 |
| rs10072025      | 44843494 | C      | T  | 0.62 | 0.92 | 3.22E-16 | 0.90 | 5.21E-18 | 0.98 | 0.34 | Imp | 0.99 |
| rs6875933       | 44786696 | C      | T  | 0.38 | 1.09 | 3.26E-16 | 1.11 | 6.99E-18 | 1.02 | 0.35 | Imp | 0.97 |
| rs11750119      | 44786141 | G      | T  | 0.38 | 1.09 | 3.29E-16 | 1.11 | 6.37E-18 | 1.02 | 0.35 | Imp | 0.99 |
| rs13154729      | 44892929 | C      | T  | 0.61 | 0.92 | 3.30E-16 | 0.91 | 9.07E-18 | 0.98 | 0.36 | Imp | 0.99 |
| rs10057341      | 44931840 | C      | T  | 0.61 | 0.92 | 3.34E-16 | 0.90 | 6.56E-18 | 0.98 | 0.36 | Gen | 1.00 |
| chr5:44904186:D | 44904186 | CACTTA | C  | 0.59 | 0.92 | 3.37E-16 | 0.90 | 1.97E-17 | 0.98 | 0.43 | Imp | 0.94 |
| rs13153556      | 44928101 | G      | A  | 0.61 | 0.92 | 3.40E-16 | 0.90 | 6.16E-18 | 0.98 | 0.36 | Gen | 1.00 |
| rs10059086      | 44872007 | C      | T  | 0.61 | 0.92 | 3.42E-16 | 0.91 | 1.13E-17 | 0.98 | 0.34 | Gen | 1.00 |
| rs2330619       | 44796062 | T      | C  | 0.38 | 1.08 | 3.43E-16 | 1.10 | 9.62E-18 | 1.02 | 0.36 | Imp | 0.99 |
| rs13168400      | 44883536 | C      | T  | 0.61 | 0.92 | 3.45E-16 | 0.91 | 1.22E-17 | 0.98 | 0.36 | Imp | 0.99 |
| rs67274820      | 44782295 | T      | C  | 0.38 | 1.08 | 3.50E-16 | 1.11 | 7.18E-18 | 1.02 | 0.37 | Imp | 0.99 |
| chr5:44795637:I | 44795637 | G      | GA | 0.38 | 1.08 | 3.51E-16 | 1.11 | 8.66E-18 | 1.02 | 0.36 | Imp | 0.99 |

|            |          |   |   |      |      |          |      |          |      |      |     |      |
|------------|----------|---|---|------|------|----------|------|----------|------|------|-----|------|
| rs10069220 | 44881978 | G | A | 0.61 | 0.92 | 3.53E-16 | 0.91 | 1.05E-17 | 0.98 | 0.33 | Gen | 1.00 |
| rs4495192  | 44929177 | T | C | 0.62 | 0.92 | 3.56E-16 | 0.90 | 5.47E-18 | 0.98 | 0.35 | Imp | 0.99 |
| rs13157608 | 44881504 | C | T | 0.61 | 0.92 | 3.62E-16 | 0.91 | 1.27E-17 | 0.98 | 0.36 | Imp | 0.99 |
| rs10941687 | 44921183 | G | A | 0.62 | 0.92 | 3.67E-16 | 0.90 | 6.65E-18 | 0.98 | 0.35 | Imp | 0.99 |
| rs10040488 | 44880288 | G | T | 0.62 | 0.92 | 3.69E-16 | 0.91 | 1.30E-17 | 0.98 | 0.36 | Imp | 0.99 |
| rs9637783  | 44819646 | T | G | 0.39 | 1.08 | 3.70E-16 | 1.11 | 6.26E-18 | 1.02 | 0.37 | Gen | 1.00 |
| rs4866920  | 44879146 | G | T | 0.62 | 0.92 | 3.76E-16 | 0.91 | 1.35E-17 | 0.98 | 0.36 | Imp | 0.99 |
| rs10473376 | 44931228 | C | T | 0.62 | 0.92 | 3.79E-16 | 0.90 | 7.90E-18 | 0.98 | 0.36 | Imp | 0.99 |
| rs4591754  | 44895091 | G | A | 0.62 | 0.92 | 3.80E-16 | 0.91 | 9.81E-18 | 0.98 | 0.36 | Imp | 0.99 |
| rs7356604  | 44895199 | T | C | 0.62 | 0.92 | 3.80E-16 | 0.91 | 9.82E-18 | 0.98 | 0.36 | Imp | 0.99 |
| rs12652026 | 44798609 | C | T | 0.38 | 1.08 | 3.83E-16 | 1.11 | 8.81E-18 | 1.02 | 0.36 | Imp | 0.99 |
| rs4642377  | 44885240 | A | T | 0.61 | 0.92 | 3.84E-16 | 0.91 | 1.40E-17 | 0.98 | 0.35 | Imp | 0.99 |
| rs6875287  | 44941630 | C | T | 0.39 | 1.09 | 3.85E-16 | 1.10 | 1.44E-17 | 1.02 | 0.32 | Imp | 0.98 |
| rs10042455 | 44925018 | A | G | 0.62 | 0.92 | 3.91E-16 | 0.90 | 6.70E-18 | 0.98 | 0.35 | Imp | 0.99 |
| rs13187933 | 44883243 | T | C | 0.62 | 0.92 | 3.93E-16 | 0.91 | 1.08E-17 | 0.98 | 0.36 | Imp | 0.99 |
| rs6883465  | 44891620 | T | C | 0.62 | 0.92 | 4.01E-16 | 0.91 | 9.16E-18 | 0.98 | 0.37 | Imp | 0.99 |
| rs4391175  | 44890056 | A | G | 0.62 | 0.92 | 4.03E-16 | 0.90 | 9.00E-18 | 0.98 | 0.37 | Imp | 0.99 |
| rs10070037 | 44870237 | A | T | 0.61 | 0.92 | 4.07E-16 | 0.91 | 1.06E-17 | 0.98 | 0.37 | Gen | 1.00 |
| rs7718354  | 44891014 | T | G | 0.62 | 0.92 | 4.08E-16 | 0.91 | 9.29E-18 | 0.98 | 0.37 | Imp | 0.99 |
| rs7734331  | 44895588 | G | A | 0.62 | 0.92 | 4.13E-16 | 0.91 | 9.36E-18 | 0.98 | 0.37 | Imp | 0.99 |
| rs11948387 | 44884241 | T | C | 0.62 | 0.92 | 4.16E-16 | 0.91 | 1.13E-17 | 0.98 | 0.36 | Imp | 0.99 |
| rs6859157  | 44783838 | G | A | 0.38 | 1.08 | 4.17E-16 | 1.11 | 8.33E-18 | 1.02 | 0.37 | Imp | 0.99 |
| rs11958451 | 44866902 | A | G | 0.61 | 0.92 | 4.20E-16 | 0.91 | 1.53E-17 | 0.98 | 0.35 | Imp | 0.99 |
| rs4323241  | 44929156 | T | C | 0.61 | 0.92 | 4.28E-16 | 0.90 | 1.72E-17 | 0.98 | 0.33 | Imp | 0.97 |
| rs10060878 | 44899424 | T | C | 0.61 | 0.92 | 4.37E-16 | 0.91 | 8.78E-18 | 0.98 | 0.36 | Gen | 1.00 |
| rs6894324  | 44867336 | G | C | 0.62 | 0.92 | 4.37E-16 | 0.91 | 1.38E-17 | 0.98 | 0.35 | Imp | 0.99 |
| rs10040082 | 44865854 | T | C | 0.62 | 0.92 | 4.43E-16 | 0.91 | 1.50E-17 | 0.98 | 0.34 | Gen | 1.00 |
| rs9292914  | 44871381 | A | C | 0.61 | 0.92 | 4.45E-16 | 0.91 | 1.23E-17 | 0.98 | 0.37 | Gen | 1.00 |
| rs10065638 | 44866162 | T | C | 0.61 | 0.92 | 4.48E-16 | 0.91 | 1.39E-17 | 0.98 | 0.34 | Gen | 0.98 |
| rs10473377 | 44931246 | T | C | 0.62 | 0.92 | 4.49E-16 | 0.90 | 8.71E-18 | 0.98 | 0.35 | Imp | 0.99 |
| rs34501299 | 44913079 | T | G | 0.61 | 0.92 | 4.50E-16 | 0.91 | 1.16E-17 | 0.98 | 0.38 | Gen | 1.00 |
| rs4395640  | 44869100 | T | C | 0.62 | 0.92 | 4.53E-16 | 0.91 | 1.47E-17 | 0.98 | 0.35 | Gen | 1.00 |
| rs7708686  | 44922838 | C | G | 0.62 | 0.92 | 4.69E-16 | 0.90 | 7.26E-18 | 0.98 | 0.35 | Imp | 0.99 |
| rs7708506  | 44922704 | C | G | 0.62 | 0.92 | 4.73E-16 | 0.90 | 7.31E-18 | 0.98 | 0.35 | Imp | 0.99 |
| rs12109710 | 44929928 | A | G | 0.62 | 0.92 | 4.74E-16 | 0.90 | 9.42E-18 | 0.98 | 0.35 | Imp | 0.98 |
| rs6868779  | 44886000 | A | G | 0.61 | 0.92 | 4.80E-16 | 0.91 | 1.42E-17 | 0.98 | 0.36 | Gen | 1.00 |
| rs13356086 | 44887679 | T | C | 0.62 | 0.92 | 4.84E-16 | 0.91 | 1.08E-17 | 0.98 | 0.37 | Imp | 0.98 |
| rs11951760 | 44872172 | G | A | 0.62 | 0.92 | 4.97E-16 | 0.91 | 1.18E-17 | 0.98 | 0.39 | Imp | 0.99 |
| rs4866784  | 44901131 | T | C | 0.61 | 0.92 | 5.05E-16 | 0.91 | 1.01E-17 | 0.98 | 0.38 | Gen | 1.00 |
| rs10057521 | 44865986 | C | T | 0.60 | 0.92 | 5.07E-16 | 0.91 | 1.51E-17 | 0.98 | 0.36 | Gen | 0.95 |
| rs4129642  | 44898129 | G | T | 0.61 | 0.92 | 5.12E-16 | 0.91 | 9.43E-18 | 0.98 | 0.36 | Gen | 1.00 |



|                 |          |        |       |      |      |          |      |          |      |      |     |      |
|-----------------|----------|--------|-------|------|------|----------|------|----------|------|------|-----|------|
| rs6881563       | 44912853 | C      | T     | 0.61 | 0.92 | 5.28E-16 | 0.91 | 1.38E-17 | 0.98 | 0.38 | Gen | 1.00 |
| rs4866783       | 44876507 | C      | T     | 0.62 | 0.92 | 5.62E-16 | 0.91 | 1.38E-17 | 0.98 | 0.39 | Imp | 0.98 |
| rs7708705       | 44922925 | A      | G     | 0.62 | 0.92 | 5.67E-16 | 0.90 | 7.88E-18 | 0.98 | 0.35 | Imp | 0.98 |
| rs10039173      | 44903376 | C      | T     | 0.61 | 0.92 | 5.74E-16 | 0.91 | 1.03E-17 | 0.98 | 0.41 | Gen | 1.00 |
| rs6870136       | 44910662 | G      | A     | 0.61 | 0.92 | 5.76E-16 | 0.91 | 1.41E-17 | 0.98 | 0.40 | Gen | 1.00 |
| rs10060645      | 44908199 | C      | T     | 0.61 | 0.92 | 6.23E-16 | 0.91 | 1.57E-17 | 0.98 | 0.40 | Imp | 0.99 |
| rs10045264      | 44886432 | G      | A     | 0.61 | 0.92 | 6.24E-16 | 0.91 | 1.93E-17 | 0.98 | 0.36 | Gen | 1.00 |
| rs6880275       | 44908935 | T      | C     | 0.62 | 0.92 | 7.75E-16 | 0.91 | 1.48E-17 | 0.98 | 0.41 | Imp | 0.99 |
| rs9791056       | 44903891 | T      | C     | 0.61 | 0.92 | 8.09E-16 | 0.91 | 1.25E-17 | 0.98 | 0.41 | Gen | 1.00 |
| rs9791059       | 44900447 | A      | C     | 0.62 | 0.92 | 8.13E-16 | 0.90 | 8.88E-18 | 0.98 | 0.42 | Imp | 0.98 |
| chr5:44904190:D | 44904190 | TAACTC | T     | 0.61 | 0.92 | 8.31E-16 | 0.91 | 1.55E-17 | 0.98 | 0.41 | Imp | 0.99 |
| chr5:44842792:D | 44842792 | CT     | C     | 0.56 | 0.92 | 8.78E-16 | 0.90 | 3.54E-19 | 1.00 | 0.97 | Imp | 0.94 |
| chr5:44842794:D | 44842794 | CCAGTT | C     | 0.56 | 0.92 | 8.80E-16 | 0.90 | 3.56E-19 | 1.00 | 0.97 | Imp | 0.94 |
| chr5:44842796:D | 44842796 | AGTTC  | A     | 0.56 | 0.92 | 8.80E-16 | 0.90 | 3.55E-19 | 1.00 | 0.97 | Imp | 0.94 |
| rs4457088       | 44900954 | T      | A     | 0.62 | 0.92 | 8.85E-16 | 0.91 | 1.29E-17 | 0.98 | 0.41 | Imp | 0.99 |
| chr5:44782479:D | 44782479 | AT     | A     | 0.38 | 1.08 | 8.87E-16 | 1.10 | 1.30E-17 | 1.02 | 0.37 | Imp | 0.98 |
| rs4866921       | 44917137 | T      | C     | 0.62 | 0.92 | 9.83E-16 | 0.91 | 1.34E-17 | 0.98 | 0.41 | Imp | 0.99 |
| rs9791164       | 44904030 | A      | G     | 0.62 | 0.92 | 9.92E-16 | 0.91 | 1.70E-17 | 0.98 | 0.42 | Imp | 0.99 |
| rs6874167       | 44916674 | G      | A     | 0.62 | 0.92 | 1.01E-15 | 0.91 | 1.49E-17 | 0.98 | 0.41 | Imp | 0.99 |
| rs4360054       | 44929004 | A      | G     | 0.61 | 0.92 | 1.10E-15 | 0.91 | 2.52E-17 | 0.98 | 0.41 | Imp | 0.98 |
| rs6895062       | 44916492 | T      | C     | 0.62 | 0.92 | 1.12E-15 | 0.91 | 1.84E-17 | 0.98 | 0.40 | Imp | 0.98 |
| chr5:44852861:D | 44852861 | AC     | A     | 0.61 | 0.92 | 1.59E-15 | 0.91 | 6.38E-17 | 0.98 | 0.31 | Imp | 0.96 |
| rs7449277       | 44841457 | T      | A     | 0.60 | 0.92 | 2.06E-15 | 0.91 | 7.34E-17 | 0.98 | 0.35 | Imp | 0.95 |
| chr5:44885826:I | 44885826 | A      | AAATT | 0.61 | 0.92 | 2.29E-15 | 0.90 | 1.66E-17 | 0.99 | 0.53 | Imp | 0.96 |
| rs7702464       | 44826259 | A      | C     | 0.27 | 1.11 | 2.32E-15 | 1.13 | 6.87E-17 | 1.03 | 0.20 | Imp | 0.74 |
| chr5:44928978:D | 44928978 | ACCCTC | A     | 0.55 | 0.92 | 2.80E-15 | 0.90 | 3.15E-17 | 0.99 | 0.58 | Imp | 0.88 |
| chr5:44921956:I | 44921956 | T      | TA    | 0.61 | 0.92 | 3.19E-15 | 0.90 | 3.29E-17 | 0.99 | 0.54 | Imp | 0.95 |
| rs74724331      | 44758161 | G      | A     | 0.40 | 1.08 | 3.28E-15 | 1.10 | 7.61E-17 | 1.01 | 0.47 | Imp | 0.95 |
| rs13178923      | 44929285 | T      | A     | 0.57 | 0.92 | 1.03E-14 | 0.91 | 4.38E-15 | 0.98 | 0.34 | Imp | 0.87 |
| rs12658334      | 44689131 | G      | A     | 0.39 | 1.09 | 2.72E-14 | 1.12 | 3.65E-16 | 1.02 | 0.50 | Imp | 0.73 |
| chr5:44832897:I | 44832897 | A      | ATGTT | 0.59 | 0.93 | 5.26E-14 | 0.91 | 6.86E-16 | 0.99 | 0.79 | Imp | 0.94 |
| rs183946926     | 44688992 | G      | A     | 0.37 | 1.09 | 1.05E-13 | 1.12 | 1.55E-16 | 1.03 | 0.25 | Imp | 0.69 |
| chr5:44868315:D | 44868315 | AAT    | A     | 0.48 | 0.93 | 1.26E-12 | 0.91 | 1.39E-13 | 0.97 | 0.13 | Imp | 0.79 |
| rs200229088     | 44701817 | TTG    | T     | 0.31 | 1.09 | 2.28E-12 | 1.12 | 1.26E-13 | 1.04 | 0.15 | Imp | 0.65 |
| rs4562047       | 44868093 | C      | T     | 0.48 | 0.93 | 1.52E-11 | 0.91 | 7.18E-14 | 0.99 | 0.68 | Imp | 0.77 |
| rs2067980       | 44982317 | A      | G     | 0.16 | 1.09 | 2.51E-11 | 1.12 | 4.35E-13 | 1.04 | 0.17 | Gen | 1.00 |
| rs73093976      | 44609392 | C      | T     | 0.17 | 1.09 | 6.67E-11 | 1.12 | 8.34E-13 | 1.02 | 0.36 | Imp | 0.95 |
| rs147039293     | 44673324 | C      | T     | 0.14 | 0.92 | 3.98E-10 | 0.90 | 2.66E-10 | 0.93 | 0.01 | Imp | 0.96 |
| rs75209549      | 44629545 | A      | G     | 0.14 | 1.09 | 6.64E-10 | 1.11 | 1.25E-10 | 1.02 | 0.53 | Imp | 0.89 |
| rs112234443     | 44922557 | C      | T     | 0.05 | 1.16 | 1.10E-09 | 1.19 | 5.72E-10 | 1.07 | 0.14 | Imp | 0.90 |
| rs76001691      | 44633373 | T      | C     | 0.05 | 1.16 | 1.14E-09 | 1.18 | 4.23E-09 | 1.09 | 0.07 | Imp | 0.82 |

|                 |          |      |     |      |      |          |      |          |      |      |     |      |
|-----------------|----------|------|-----|------|------|----------|------|----------|------|------|-----|------|
| rs4549535       | 44630291 | A    | G   | 0.05 | 1.15 | 1.58E-09 | 1.17 | 9.53E-10 | 1.08 | 0.09 | Imp | 0.93 |
| rs6880469       | 44975989 | A    | G   | 0.35 | 1.06 | 1.83E-09 | 1.08 | 2.19E-10 | 1.01 | 0.57 | Imp | 0.98 |
| rs6451787       | 45009269 | T    | G   | 0.17 | 1.09 | 2.53E-09 | 1.11 | 2.10E-10 | 1.03 | 0.23 | Imp | 0.84 |
| rs28705196      | 44631795 | T    | C   | 0.05 | 1.14 | 4.04E-09 | 1.17 | 1.01E-09 | 1.06 | 0.18 | Imp | 0.97 |
| chr5:44633359:l | 44633359 | T    | TTC | 0.05 | 1.14 | 4.39E-09 | 1.17 | 1.36E-09 | 1.06 | 0.17 | Imp | 0.95 |
| chr5:44633372:l | 44633372 | T    | TC  | 0.05 | 1.14 | 4.39E-09 | 1.17 | 1.36E-09 | 1.06 | 0.17 | Imp | 0.95 |
| rs5004228       | 44632008 | A    | G   | 0.05 | 1.14 | 4.63E-09 | 1.16 | 2.03E-09 | 1.07 | 0.13 | Gen | 1.00 |
| rs116443643     | 44606969 | C    | A   | 0.15 | 0.92 | 5.30E-09 | 0.91 | 1.78E-09 | 0.95 | 0.04 | Imp | 0.95 |
| rs13357090      | 44632713 | C    | T   | 0.05 | 1.14 | 7.05E-09 | 1.16 | 3.72E-09 | 1.07 | 0.12 | Imp | 0.96 |
| chr5:44681918:l | 44681918 | C    | CA  | 0.04 | 0.84 | 7.16E-09 | 0.82 | 3.71E-08 | 0.88 | 0.03 | Imp | 0.58 |
| c5_pos44839303  | 44803546 | A    | G   | 0.14 | 0.92 | 7.49E-09 | 0.91 | 2.36E-08 | 0.93 | 0.01 | Gen | 1.00 |
| rs112754768     | 44718764 | A    | G   | 0.05 | 1.15 | 8.65E-09 | 1.18 | 6.28E-09 | 1.06 | 0.19 | Imp | 0.88 |
| rs34692501      | 45029217 | A    | G   | 0.13 | 1.09 | 9.49E-09 | 1.11 | 7.72E-10 | 1.03 | 0.30 | Gen | 1.00 |
| rs10941712      | 45917605 | C    | T   | 0.23 | 0.93 | 9.61E-09 | 0.91 | 1.42E-10 | 0.95 | 0.02 | Imp | 0.78 |
| rs11750654      | 44494303 | T    | C   | 0.15 | 0.92 | 1.13E-08 | 0.91 | 2.84E-09 | 0.95 | 0.04 | Imp | 0.95 |
| rs11750655      | 44494312 | T    | C   | 0.15 | 0.92 | 1.13E-08 | 0.91 | 2.84E-09 | 0.95 | 0.04 | Imp | 0.95 |
| rs3935086       | 44960923 | T    | A   | 0.33 | 1.06 | 1.14E-08 | 1.07 | 2.76E-09 | 1.01 | 0.64 | Gen | 1.00 |
| rs79670114      | 44861045 | A    | G   | 0.04 | 1.16 | 1.24E-08 | 1.19 | 2.52E-09 | 1.06 | 0.23 | Imp | 0.88 |
| rs11742346      | 45003293 | C    | T   | 0.13 | 1.09 | 1.29E-08 | 1.11 | 1.45E-09 | 1.03 | 0.24 | Imp | 0.94 |
| rs12520604      | 44476872 | A    | C   | 0.04 | 1.16 | 1.34E-08 | 1.20 | 4.72E-09 | 1.03 | 0.56 | Imp | 0.91 |
| c5_pos44832736  | 44796979 | C    | T   | 0.14 | 0.92 | 1.36E-08 | 0.91 | 4.34E-08 | 0.93 | 0.01 | Gen | 0.99 |
| c5_pos44671855  | 44636098 | G    | C   | 0.20 | 0.93 | 1.41E-08 | 0.92 | 6.26E-09 | 0.96 | 0.10 | Gen | 1.00 |
| rs187108781     | 44619502 | A    | G   | 0.15 | 0.92 | 1.59E-08 | 0.91 | 6.61E-09 | 0.95 | 0.04 | Imp | 0.95 |
| chr5:44795636:l | 44795636 | A    | AG  | 0.28 | 1.07 | 1.68E-08 | 1.09 | 9.96E-10 | 1.00 | 0.87 | Imp | 0.85 |
| c5_pos45369617  | 45333860 | T    | C   | 0.26 | 0.94 | 1.71E-08 | 0.92 | 1.56E-10 | 0.96 | 0.05 | Gen | 1.00 |
| rs12516986      | 44526154 | A    | G   | 0.04 | 1.15 | 1.80E-08 | 1.18 | 6.09E-09 | 1.03 | 0.50 | Gen | 1.00 |
| rs7702731       | 44914285 | A    | G   | 0.68 | 0.94 | 2.80E-08 | 0.94 | 2.63E-08 | 0.99 | 0.71 | Gen | 0.98 |
| rs75036127      | 44802928 | A    | T   | 0.04 | 1.15 | 3.47E-08 | 1.19 | 5.58E-09 | 1.05 | 0.33 | Imp | 0.88 |
| rs72748037      | 44449376 | G    | A   | 0.15 | 0.93 | 3.51E-08 | 0.91 | 1.02E-08 | 0.95 | 0.04 | Imp | 0.97 |
| rs13183434      | 45074633 | G    | A   | 0.13 | 1.08 | 3.67E-08 | 1.11 | 1.91E-09 | 1.04 | 0.21 | Gen | 1.00 |
| chr5:45943429:D | 45943429 | CTCT | C   | 0.16 | 0.92 | 3.72E-08 | 0.89 | 1.09E-09 | 0.92 | 0.01 | Imp | 0.70 |
| rs11745472      | 44929256 | A    | T   | 0.12 | 1.11 | 3.83E-08 | 1.13 | 5.18E-08 | 1.03 | 0.39 | Imp | 0.61 |
| rs72748026      | 44431924 | C    | G   | 0.14 | 0.92 | 3.86E-08 | 0.91 | 3.78E-09 | 0.95 | 0.05 | Imp | 0.95 |
| rs17343002      | 44853593 | G    | C   | 0.31 | 0.94 | 4.36E-08 | 0.94 | 9.13E-08 | 0.96 | 0.06 | Gen | 1.00 |
| c5_pos44489027  | 44453270 | T    | G   | 0.15 | 0.93 | 4.89E-08 | 0.91 | 1.65E-08 | 0.95 | 0.04 | Gen | 1.00 |
| rs11738503      | 45011742 | A    | G   | 0.16 | 1.08 | 5.09E-08 | 1.10 | 4.71E-09 | 1.04 | 0.19 | Imp | 0.87 |
| rs11741260      | 44412065 | G    | A   | 0.14 | 0.93 | 5.14E-08 | 0.91 | 5.32E-09 | 0.95 | 0.05 | Gen | 1.00 |
| rs11948186      | 45051434 | A    | G   | 0.34 | 1.06 | 5.17E-08 | 1.07 | 7.10E-09 | 1.01 | 0.69 | Imp | 0.97 |
| rs7701656       | 44947702 | T    | C   | 0.13 | 1.08 | 5.71E-08 | 1.11 | 2.64E-09 | 1.00 | 0.90 | Gen | 1.00 |
| chr5:44692568:l | 44692568 | G    | GT  | 0.21 | 0.93 | 6.86E-08 | 0.92 | 8.13E-08 | 0.96 | 0.09 | Imp | 0.90 |
| rs78797445      | 44795797 | G    | A   | 0.19 | 0.94 | 8.81E-08 | 0.93 | 1.30E-07 | 0.96 | 0.08 | Imp | 0.97 |

|                 |          |         |       |      |      |          |      |          |      |      |     |      |
|-----------------|----------|---------|-------|------|------|----------|------|----------|------|------|-----|------|
| chr5:45162687:D | 45162687 | AGATCT  | A     | 0.14 | 0.93 | 1.03E-07 | 0.91 | 2.86E-08 | 0.93 | 0.01 | Imp | 0.95 |
| c5_pos44754116  | 44718359 | G       | A     | 0.19 | 0.94 | 1.03E-07 | 0.93 | 1.25E-07 | 0.95 | 0.05 | Gen | 1.00 |
| rs111385188     | 44675187 | G       | A     | 0.04 | 1.16 | 1.22E-07 | 1.19 | 2.96E-08 | 1.07 | 0.22 | Imp | 0.85 |
| rs62372990      | 45988038 | G       | A     | 0.06 | 1.14 | 1.26E-07 | 1.15 | 3.53E-07 | 1.07 | 0.12 | Imp | 0.76 |
| c5_pos44754266  | 44718509 | G       | A     | 0.07 | 1.11 | 1.27E-07 | 1.15 | 5.01E-10 | 1.04 | 0.30 | Gen | 1.00 |
| rs7293402       | 45990381 | G       | A     | 0.06 | 1.13 | 1.40E-07 | 1.15 | 4.28E-07 | 1.07 | 0.13 | Imp | 0.76 |
| rs147872430     | 45239336 | C       | T     | 0.14 | 0.93 | 1.52E-07 | 0.91 | 3.35E-08 | 0.93 | 0.01 | Imp | 0.96 |
| chr5:44945030:I | 44945030 | T       | TA    | 0.19 | 0.93 | 1.76E-07 | 0.93 | 3.34E-07 | 0.96 | 0.08 | Imp | 0.92 |
| rs10051592      | 45090306 | T       | G     | 0.33 | 1.06 | 1.83E-07 | 1.07 | 1.67E-08 | 1.01 | 0.79 | Gen | 1.00 |
| c5_pos45171325  | 45135568 | G       | C     | 0.14 | 0.93 | 1.97E-07 | 0.91 | 4.97E-08 | 0.93 | 0.01 | Gen | 1.00 |
| chr5:44518580:I | 44518580 | C       | CT    | 0.21 | 0.94 | 2.25E-07 | 0.93 | 2.21E-06 | 0.93 | 0.00 | Imp | 0.87 |
| rs11743309      | 45122388 | A       | G     | 0.14 | 0.93 | 2.27E-07 | 0.92 | 8.71E-08 | 0.93 | 0.00 | Gen | 1.00 |
| c5_pos45322045  | 45286288 | T       | A     | 0.14 | 0.93 | 2.61E-07 | 0.92 | 6.68E-08 | 0.94 | 0.01 | Gen | 0.99 |
| c5_pos45028737  | 44992980 | G       | T     | 0.14 | 0.93 | 3.09E-07 | 0.92 | 1.57E-06 | 0.94 | 0.02 | Gen | 1.00 |
| c5_pos45149948  | 45114191 | C       | T     | 0.14 | 0.93 | 3.74E-07 | 0.92 | 1.15E-07 | 0.93 | 0.01 | Gen | 1.00 |
| rs9763350       | 45882593 | T       | C     | 0.26 | 1.07 | 4.25E-07 | 1.08 | 6.84E-07 | 1.08 | 0.00 | Imp | 0.71 |
| rs11740651      | 45302476 | C       | A     | 0.14 | 0.93 | 7.20E-07 | 0.91 | 7.54E-08 | 0.94 | 0.03 | Imp | 0.91 |
| chr5:44976998:I | 44976998 | G       | GTGAT | 0.11 | 1.08 | 9.83E-07 | 1.11 | 5.80E-08 | 1.02 | 0.44 | Imp | 0.93 |
| rs13172124      | 45160377 | C       | T     | 0.46 | 0.95 | 1.13E-06 | 0.94 | 4.25E-07 | 0.98 | 0.22 | Imp | 0.96 |
| rs13186320      | 44302177 | A       | T     | 0.47 | 1.05 | 1.19E-06 | 1.07 | 1.46E-07 | 1.04 | 0.05 | Imp | 0.86 |
| rs72750030      | 45903837 | G       | A     | 0.11 | 0.92 | 1.26E-06 | 0.89 | 1.33E-07 | 0.92 | 0.02 | Imp | 0.70 |
| rs72751936      | 45984433 | G       | A     | 0.11 | 0.91 | 1.33E-06 | 0.88 | 2.66E-07 | 0.90 | 0.01 | Imp | 0.59 |
| c5_pos45135048  | 45099291 | G       | A     | 0.09 | 0.92 | 1.53E-06 | 0.91 | 7.00E-06 | 0.92 | 0.01 | Gen | 1.00 |
| rs147517548     | 44711323 | C       | T     | 0.01 | 1.3  | 1.55E-06 | 1.37 | 5.35E-07 | 1.18 | 0.11 | Imp | 0.68 |
| rs13156720      | 44823321 | A       | G     | 0.02 | 1.19 | 1.79E-06 | 1.25 | 1.18E-07 | 1.08 | 0.28 | Imp | 0.77 |
| c5_pos444444935 | 44409178 | C       | A     | 0.06 | 0.91 | 1.90E-06 | 0.89 | 8.08E-07 | 0.95 | 0.18 | Gen | 1.00 |
| rs4866929       | 45266589 | A       | G     | 0.47 | 0.95 | 1.98E-06 | 0.94 | 5.79E-07 | 0.98 | 0.21 | Gen | 1.00 |
| chr5:45210850:D | 45210850 | CTATAA  | C     | 0.45 | 0.95 | 2.02E-06 | 0.94 | 7.09E-07 | 0.97 | 0.17 | Imp | 0.92 |
| rs11959880      | 45958226 | G       | A     | 0.09 | 0.9  | 2.06E-06 | 0.89 | 2.01E-06 | 0.90 | 0.01 | Imp | 0.58 |
| rs17268417      | 44700201 | T       | C     | 0.05 | 1.12 | 2.08E-06 | 1.15 | 4.60E-07 | 1.08 | 0.07 | Gen | 0.95 |
| chr5:45210851:D | 45210851 | TATAAA  | T     | 0.45 | 0.95 | 2.31E-06 | 0.94 | 7.39E-07 | 0.97 | 0.16 | Imp | 0.92 |
| chr5:44349569:D | 44349569 | TATCAGA | T     | 0.43 | 1.06 | 2.33E-06 | 1.06 | 3.88E-06 | 1.03 | 0.22 | Imp | 0.70 |
| rs11738948      | 44999799 | G       | C     | 0.20 | 0.94 | 2.45E-06 | 0.94 | 1.32E-05 | 0.95 | 0.05 | Imp | 0.96 |
| rs72750027      | 45899603 | G       | A     | 0.01 | 1.43 | 2.55E-06 | 1.46 | 1.45E-05 | 1.42 | 0.01 | Imp | 0.66 |
| rs72765759      | 45846620 | C       | T     | 0.11 | 0.92 | 2.91E-06 | 0.90 | 2.28E-07 | 0.94 | 0.06 | Imp | 0.73 |
| rs981782        | 45285718 | A       | C     | 0.47 | 0.96 | 3.13E-06 | 0.95 | 8.27E-07 | 0.98 | 0.30 | Imp | 0.97 |
| rs137877813     | 45084544 | G       | C     | 0.14 | 0.94 | 3.13E-06 | 0.93 | 4.96E-06 | 0.94 | 0.02 | Imp | 0.96 |
| rs138117035     | 45938300 | T       | C     | 0.10 | 0.91 | 3.23E-06 | 0.89 | 7.08E-07 | 0.93 | 0.05 | Imp | 0.61 |
| rs145696903     | 45933347 | G       | A     | 0.10 | 0.91 | 3.38E-06 | 0.89 | 9.01E-07 | 0.92 | 0.04 | Imp | 0.61 |
| chr5:44302175:D | 44302175 | CA      | C     | 0.51 | 1.05 | 3.46E-06 | 1.06 | 3.54E-07 | 1.03 | 0.17 | Imp | 0.94 |
| rs75442098      | 44498735 | C       | A     | 0.03 | 0.86 | 3.56E-06 | 0.84 | 1.40E-05 | 0.91 | 0.15 | Imp | 0.65 |

|                 |          |       |   |      |      |          |      |          |      |      |     |      |
|-----------------|----------|-------|---|------|------|----------|------|----------|------|------|-----|------|
| rs16902086      | 45285752 | A     | G | 0.34 | 1.05 | 3.60E-06 | 1.06 | 6.45E-07 | 1.02 | 0.34 | Gen | 1.00 |
| rs72762052      | 45427937 | C     | T | 0.13 | 0.93 | 3.83E-06 | 0.91 | 6.81E-07 | 0.93 | 0.03 | Imp | 0.81 |
| rs72750038      | 45912279 | T     | C | 0.10 | 0.91 | 3.87E-06 | 0.89 | 1.15E-06 | 0.92 | 0.02 | Imp | 0.65 |
| rs74833952      | 44961224 | G     | A | 0.02 | 0.76 | 4.76E-06 | 0.75 | 2.64E-05 | 0.80 | 0.06 | Imp | 0.42 |
| rs11747840      | 44984579 | C     | T | 0.21 | 0.95 | 4.97E-06 | 0.94 | 1.74E-05 | 0.96 | 0.08 | Imp | 0.94 |
| rs72751917      | 45949866 | G     | A | 0.01 | 1.4  | 5.21E-06 | 1.40 | 6.02E-05 | 1.38 | 0.02 | Imp | 0.51 |
| rs11750845      | 44373060 | C     | T | 0.51 | 1.05 | 5.39E-06 | 1.06 | 4.54E-07 | 1.02 | 0.27 | Gen | 1.00 |
| rs72759922      | 45005236 | C     | T | 0.21 | 0.95 | 6.67E-06 | 0.94 | 1.09E-05 | 0.97 | 0.16 | Imp | 0.94 |
| rs72763959      | 45707287 | C     | A | 0.01 | 1.33 | 6.84E-06 | 1.36 | 3.85E-05 | 1.28 | 0.03 | Imp | 0.69 |
| rs35190075      | 44776604 | C     | G | 0.02 | 1.18 | 7.49E-06 | 1.25 | 5.20E-07 | 1.11 | 0.15 | Imp | 0.76 |
| rs185330077     | 45366544 | G     | A | 0.01 | 1.48 | 7.60E-06 | 1.69 | 9.92E-08 | 0.94 | 0.70 | Imp | 0.39 |
| rs182455548     | 45746470 | G     | A | 0.01 | 1.33 | 7.67E-06 | 1.35 | 3.70E-05 | 1.28 | 0.04 | Imp | 0.69 |
| rs72763975      | 45767075 | G     | A | 0.01 | 1.33 | 7.78E-06 | 1.35 | 3.66E-05 | 1.28 | 0.04 | Imp | 0.69 |
| c5_pos44897529  | 44861772 | T     | C | 0.04 | 1.11 | 8.41E-06 | 1.14 | 9.56E-07 | 1.05 | 0.26 | Gen | 1.00 |
| rs72763992      | 45806419 | A     | T | 0.01 | 1.33 | 8.60E-06 | 1.36 | 3.32E-05 | 1.28 | 0.04 | Imp | 0.67 |
| rs148456234     | 45922475 | C     | T | 0.11 | 0.92 | 8.93E-06 | 0.90 | 1.29E-06 | 0.93 | 0.05 | Imp | 0.65 |
| rs72750006      | 45862423 | A     | G | 0.01 | 1.3  | 8.95E-06 | 1.35 | 1.57E-05 | 1.24 | 0.05 | Imp | 0.63 |
| rs72762048      | 45408899 | T     | C | 0.12 | 0.93 | 9.74E-06 | 0.91 | 2.49E-06 | 0.93 | 0.03 | Imp | 0.80 |
| rs5003385       | 44907327 | A     | C | 0.04 | 1.11 | 1.01E-05 | 1.14 | 9.29E-07 | 1.05 | 0.27 | Gen | 1.00 |
| rs191491730     | 45160378 | G     | A | 0.00 | 1.6  | 1.03E-05 | 1.83 | 4.17E-07 | 1.21 | 0.37 | Imp | 0.59 |
| rs148415520     | 45317307 | G     | A | 0.45 | 0.96 | 1.13E-05 | 0.95 | 6.59E-06 | 0.97 | 0.12 | Imp | 0.91 |
| rs76810418      | 45882608 | G     | A | 0.25 | 1.06 | 1.21E-05 | 1.07 | 1.71E-05 | 1.06 | 0.02 | Imp | 0.74 |
| chr5:44606887:D | 44606887 | AT    | A | 0.15 | 0.94 | 1.28E-05 | 0.93 | 2.00E-05 | 0.97 | 0.26 | Imp | 0.95 |
| rs147763247     | 45313905 | G     | C | 0.45 | 0.96 | 1.32E-05 | 0.95 | 6.73E-06 | 0.97 | 0.12 | Imp | 0.91 |
| rs10473395      | 45882607 | T     | C | 0.25 | 1.06 | 1.52E-05 | 1.07 | 2.30E-05 | 1.06 | 0.02 | Imp | 0.74 |
| chr5:45799799:D | 45799799 | AT    | A | 0.04 | 1.12 | 1.59E-05 | 1.13 | 5.54E-05 | 1.06 | 0.26 | Imp | 0.81 |
| rs192741232     | 44838737 | A     | G | 0.01 | 1.3  | 1.59E-05 | 1.38 | 4.74E-06 | 1.14 | 0.27 | Imp | 0.75 |
| rs150276216     | 44889423 | T     | C | 0.04 | 1.11 | 1.71E-05 | 1.14 | 2.26E-06 | 1.06 | 0.26 | Imp | 0.97 |
| rs191712805     | 45795107 | A     | G | 0.01 | 1.33 | 1.72E-05 | 1.36 | 5.89E-05 | 1.28 | 0.05 | Imp | 0.61 |
| rs4613718       | 44649944 | C     | T | 0.60 | 1.04 | 1.92E-05 | 1.06 | 5.73E-07 | 0.98 | 0.22 | Gen | 1.00 |
| rs114416420     | 45951524 | G     | T | 0.10 | 0.91 | 2.00E-05 | 0.90 | 3.06E-05 | 0.90 | 0.01 | Imp | 0.56 |
| c5_pos44663080  | 44627323 | C     | T | 0.21 | 0.95 | 2.02E-05 | 0.95 | 4.76E-05 | 0.95 | 0.04 | Gen | 1.00 |
| rs180724159     | 45562846 | T     | C | 0.00 | 1.53 | 2.04E-05 | 1.71 | 1.34E-06 | 1.20 | 0.36 | Imp | 0.72 |
| rs181673846     | 45837084 | C     | A | 0.01 | 1.34 | 2.08E-05 | 1.38 | 4.81E-05 | 1.29 | 0.05 | Imp | 0.69 |
| chr5:45853664:D | 45853664 | CAT   | C | 0.02 | 1.22 | 2.15E-05 | 1.22 | 1.25E-04 | 1.10 | 0.30 | Imp | 0.58 |
| rs139424826     | 45522979 | C     | A | 0.12 | 0.93 | 2.44E-05 | 0.90 | 1.23E-06 | 0.94 | 0.10 | Imp | 0.68 |
| rs6859397       | 45136050 | T     | C | 0.33 | 1.04 | 2.79E-05 | 1.06 | 4.14E-06 | 1.00 | 0.83 | Imp | 0.95 |
| rs4492120       | 45187804 | G     | A | 0.33 | 1.04 | 2.82E-05 | 1.06 | 2.90E-06 | 1.00 | 0.81 | Gen | 1.00 |
| chr5:44349567:D | 44349567 | TATAT | T | 0.38 | 1.05 | 2.86E-05 | 1.06 | 2.14E-05 | 1.02 | 0.43 | Imp | 0.69 |
| rs10035564      | 45252500 | A     | G | 0.34 | 1.04 | 2.98E-05 | 1.06 | 2.91E-06 | 1.01 | 0.72 | Gen | 0.96 |
| rs75513092      | 44544909 | G     | T | 0.21 | 0.95 | 3.22E-05 | 0.95 | 6.48E-05 | 0.96 | 0.06 | Imp | 0.98 |

|                 |          |      |    |      |      |          |      |          |      |      |     |      |
|-----------------|----------|------|----|------|------|----------|------|----------|------|------|-----|------|
| rs6867827       | 45317216 | G    | T  | 0.17 | 1.06 | 3.36E-05 | 1.06 | 5.26E-05 | 1.04 | 0.11 | Imp | 0.97 |
| rs139928702     | 45938421 | A    | C  | 0.05 | 1.12 | 3.47E-05 | 1.13 | 1.02E-04 | 1.08 | 0.18 | Imp | 0.62 |
| rs11748830      | 44265513 | C    | T  | 0.16 | 0.94 | 3.70E-05 | 0.94 | 3.87E-05 | 0.94 | 0.02 | Imp | 0.92 |
| rs17268006      | 44538881 | C    | T  | 0.21 | 0.95 | 4.19E-05 | 0.95 | 9.20E-05 | 0.96 | 0.05 | Gen | 0.99 |
| chr5:45686224:D | 45686224 | TA   | T  | 0.07 | 1.12 | 4.22E-05 | 1.09 | 5.64E-03 | 1.15 | 0.01 | Imp | 0.50 |
| chr5:44816722:D | 44816722 | ACTT | A  | 0.04 | 1.11 | 4.29E-05 | 1.14 | 7.24E-06 | 1.07 | 0.18 | Imp | 0.95 |
| rs72759920      | 44998794 | T    | G  | 0.04 | 1.11 | 5.13E-05 | 1.13 | 1.88E-05 | 1.06 | 0.21 | Imp | 0.92 |
| rs72759916      | 44990010 | T    | C  | 0.04 | 1.11 | 6.09E-05 | 1.13 | 1.69E-05 | 1.06 | 0.24 | Imp | 0.92 |
| rs62370579      | 45792329 | A    | T  | 0.03 | 1.15 | 6.40E-05 | 1.15 | 7.86E-04 | 1.10 | 0.17 | Imp | 0.77 |
| chr5:45843775:D | 45843775 | TTA  | T  | 0.04 | 1.12 | 6.78E-05 | 1.13 | 2.15E-04 | 1.06 | 0.29 | Imp | 0.84 |
| rs181701912     | 44888831 | C    | T  | 0.11 | 0.92 | 6.92E-05 | 0.90 | 2.49E-05 | 0.96 | 0.36 | Imp | 0.51 |
| rs10078961      | 44888856 | T    | C  | 0.29 | 0.95 | 7.00E-05 | 0.93 | 8.16E-06 | 0.99 | 0.73 | Imp | 0.63 |
| chr5:45379590:D | 45379590 | CA   | C  | 0.19 | 1.05 | 7.02E-05 | 1.06 | 7.32E-05 | 1.04 | 0.15 | Imp | 0.97 |
| rs75946047      | 44454153 | C    | T  | 0.03 | 1.14 | 7.34E-05 | 1.20 | 6.92E-06 | 1.08 | 0.26 | Imp | 0.81 |
| rs62372989      | 45987296 | A    | G  | 0.03 | 1.14 | 7.45E-05 | 1.15 | 3.22E-04 | 1.07 | 0.31 | Imp | 0.70 |
| rs12187122      | 44577879 | A    | G  | 0.03 | 1.13 | 7.77E-05 | 1.16 | 3.14E-05 | 1.01 | 0.93 | Imp | 0.91 |
| rs6451798       | 45387854 | C    | T  | 0.19 | 1.05 | 7.93E-05 | 1.06 | 8.43E-05 | 1.03 | 0.16 | Gen | 1.00 |
| rs62370581      | 45793718 | G    | A  | 0.03 | 1.12 | 8.32E-05 | 1.12 | 3.67E-04 | 1.06 | 0.28 | Imp | 0.91 |
| rs1816683       | 44701827 | G    | A  | 0.57 | 1.04 | 8.34E-05 | 1.06 | 2.73E-06 | 0.98 | 0.30 | Imp | 0.85 |
| rs75964308      | 45946479 | G    | C  | 0.04 | 1.12 | 8.48E-05 | 1.13 | 2.36E-04 | 1.06 | 0.33 | Imp | 0.77 |
| rs1501362       | 45378207 | C    | T  | 0.19 | 1.05 | 8.52E-05 | 1.06 | 7.26E-05 | 1.03 | 0.18 | Imp | 0.98 |
| rs141075872     | 45790426 | A    | T  | 0.03 | 1.13 | 8.55E-05 | 1.13 | 7.34E-04 | 1.07 | 0.25 | Imp | 0.82 |
| rs7709262       | 45342044 | A    | G  | 0.19 | 1.05 | 8.69E-05 | 1.06 | 8.62E-05 | 1.03 | 0.18 | Imp | 0.98 |
| rs144163740     | 45376455 | G    | T  | 0.36 | 0.95 | 8.87E-05 | 0.94 | 3.12E-05 | 0.98 | 0.52 | Imp | 0.61 |
| rs62370604      | 45843007 | T    | C  | 0.03 | 1.12 | 9.55E-05 | 1.13 | 3.17E-04 | 1.06 | 0.32 | Imp | 0.86 |
| rs74859464      | 45951751 | C    | A  | 0.03 | 1.12 | 9.58E-05 | 1.13 | 2.33E-04 | 1.06 | 0.33 | Imp | 0.83 |
| rs6874127       | 45305615 | A    | G  | 0.19 | 1.05 | 9.63E-05 | 1.06 | 9.12E-05 | 1.03 | 0.17 | Gen | 1.00 |
| rs75212852      | 45805592 | C    | T  | 0.03 | 1.12 | 9.76E-05 | 1.12 | 4.25E-04 | 1.06 | 0.29 | Imp | 0.91 |
| chr5:45804917:I | 45804917 | T    | TA | 0.03 | 1.12 | 9.79E-05 | 1.12 | 4.27E-04 | 1.06 | 0.29 | Imp | 0.91 |
| c5_pos45103929  | 45068172 | G    | A  | 0.04 | 1.1  | 9.85E-05 | 1.12 | 1.27E-04 | 1.05 | 0.31 | Gen | 1.00 |

**Supplementary Table 2.** The three independent signals showing the lead SNP in each signal together with the correlated SNPs that could not be excluded from causality.

| SNP             | Position | Ref/Alt | MAF  | Imputation r2 | OR (95% CI)     | Single SNP p_value | P-value conditional on signal 1 top hit | P-value conditional on signal 1 + 2 | cor_rs10941679 | cor_rs6864776 | cor_rs200229088 |
|-----------------|----------|---------|------|---------------|-----------------|--------------------|-----------------------------------------|-------------------------------------|----------------|---------------|-----------------|
| <b>Signal 1</b> |          |         |      |               |                 |                    |                                         |                                     |                |               |                 |
| rs10941679      | 44706498 | A/G     | 0.27 | 0.99          | 1.12(1.1-1.15)  | 2.60E-26           | NA                                      | NA                                  | 1.00           | 0.07          | 0.14            |
| <b>Signal 2</b> |          |         |      |               |                 |                    |                                         |                                     |                |               |                 |
| rs6864776       | 44513304 | G/A     | 0.23 | 0.97          | 1.04(1.02-1.06) | 0.00078            | 6.22E-11                                | NA                                  | 0.07           | 1.00          | 0.05            |
| chr5.44527739.l | 44527739 | ATACT/A | 0.24 | 0.96          | 1.04(1.02-1.07) | 0.00044            | 6.40E-11                                | NA                                  | 0.06           | 0.98          | 0.05            |
| rs4634356       | 44553611 | C/T     | 0.23 | 0.99          | 1.04(1.02-1.06) | 0.00076            | 7.89E-11                                | NA                                  | 0.07           | 0.99          | 0.06            |
| rs1905192       | 44531538 | A/T     | 0.23 | 0.99          | 1.04(1.02-1.06) | 0.00077            | 8.76E-11                                | NA                                  | 0.07           | 0.99          | 0.06            |
| rs4866905       | 44555867 | C/T     | 0.23 | 1.00          | 1.04(1.02-1.06) | 0.00086            | 1.02E-10                                | NA                                  | 0.07           | 0.98          | 0.06            |
| rs1482663       | 44543102 | A/G     | 0.23 | 1.00          | 1.04(1.02-1.06) | 0.00085            | 1.04E-10                                | NA                                  | 0.07           | 0.99          | 0.06            |
| chr5.44496660.l | 44496660 | AG/A    | 0.23 | 0.98          | 1.04(1.02-1.06) | 0.00087            | 1.04E-10                                | NA                                  | 0.06           | 0.99          | 0.05            |
| rs7710996       | 44514350 | G/A     | 0.23 | 0.99          | 1.04(1.02-1.06) | 0.00085            | 1.07E-10                                | NA                                  | 0.06           | 0.99          | 0.05            |
| rs6451763       | 44527841 | C/A     | 0.23 | 0.99          | 1.04(1.02-1.06) | 0.00087            | 1.09E-10                                | NA                                  | 0.07           | 0.99          | 0.05            |
| c5_pos44562807  | 44527050 | A/C     | 0.23 | 1.00          | 1.04(1.02-1.06) | 0.00087            | 1.15E-10                                | NA                                  | 0.07           | 0.99          | 0.06            |
| rs1351633       | 44543851 | C/T     | 0.23 | 0.99          | 1.04(1.02-1.06) | 0.00094            | 1.18E-10                                | NA                                  | 0.07           | 0.99          | 0.06            |
| rs1384453       | 44496114 | T/C     | 0.23 | 0.99          | 1.04(1.02-1.06) | 0.00091            | 1.20E-10                                | NA                                  | 0.06           | 0.99          | 0.05            |
| rs1482665       | 44546628 | G/A     | 0.23 | 1.00          | 1.04(1.02-1.06) | 0.00093            | 1.20E-10                                | NA                                  | 0.07           | 0.99          | 0.06            |
| rs983940        | 44544136 | G/A     | 0.23 | 0.99          | 1.04(1.02-1.06) | 0.00095            | 1.21E-10                                | NA                                  | 0.07           | 0.99          | 0.06            |
| rs6897963       | 44554781 | C/A     | 0.23 | 1.00          | 1.04(1.02-1.06) | 0.00098            | 1.33E-10                                | NA                                  | 0.07           | 0.98          | 0.06            |
| rs1384454       | 44492998 | C/T     | 0.23 | 0.99          | 1.04(1.02-1.06) | 0.00098            | 1.43E-10                                | NA                                  | 0.06           | 0.99          | 0.05            |
| rs10079222      | 44561473 | G/C     | 0.23 | 1.00          | 1.04(1.02-1.06) | 0.001              | 1.45E-10                                | NA                                  | 0.07           | 0.98          | 0.06            |
| rs7736427       | 44524276 | A/G     | 0.25 | 0.93          | 1.04(1.02-1.07) | 0.00028            | 1.48E-10                                | NA                                  | 0.05           | 0.94          | 0.05            |
| rs10512860      | 44539953 | G/C     | 0.23 | 1.00          | 1.04(1.02-1.06) | 0.001              | 1.50E-10                                | NA                                  | 0.07           | 0.99          | 0.05            |
| rs4866776       | 44525589 | T/A     | 0.23 | 1.00          | 1.04(1.02-1.06) | 0.001              | 1.52E-10                                | NA                                  | 0.07           | 0.99          | 0.05            |
| rs1482690       | 44488840 | T/A     | 0.24 | 0.98          | 1.04(1.02-1.06) | 0.0011             | 1.91E-10                                | NA                                  | 0.06           | 0.99          | 0.05            |
| rs12516346      | 44488156 | A/C     | 0.23 | 0.99          | 1.04(1.01-1.06) | 0.0016             | 2.39E-10                                | NA                                  | 0.07           | 0.97          | 0.06            |
| rs1482684       | 44478742 | G/A     | 0.23 | 1.00          | 1.04(1.01-1.06) | 0.0013             | 2.41E-10                                | NA                                  | 0.06           | 0.99          | 0.05            |
| chr5.44496659.l | 44496659 | TA/T    | 0.25 | 0.93          | 1.04(1.01-1.06) | 0.0017             | 2.41E-10                                | NA                                  | 0.07           | 0.95          | 0.05            |
| rs1482691       | 44487477 | C/A     | 0.23 | 0.99          | 1.04(1.01-1.06) | 0.0013             | 2.52E-10                                | NA                                  | 0.06           | 0.99          | 0.05            |
| rs7724859       | 44471395 | T/C     | 0.23 | 1.00          | 1.04(1.01-1.06) | 0.0014             | 2.84E-10                                | NA                                  | 0.06           | 0.99          | 0.05            |
| rs2128430       | 44462926 | T/C     | 0.23 | 0.99          | 1.04(1.01-1.06) | 0.0014             | 3.03E-10                                | NA                                  | 0.06           | 0.99          | 0.05            |
| rs7707044       | 44471392 | A/T     | 0.23 | 1.00          | 1.04(1.01-1.06) | 0.0015             | 3.15E-10                                | NA                                  | 0.06           | 0.99          | 0.05            |
| rs1905191       | 44456782 | C/T     | 0.23 | 0.98          | 1.04(1.01-1.06) | 0.0015             | 3.21E-10                                | NA                                  | 0.06           | 0.99          | 0.05            |

|                 |          |       |      |      |                 |          |          |          |      |      |      |
|-----------------|----------|-------|------|------|-----------------|----------|----------|----------|------|------|------|
| rs1120718       | 44466578 | T/C   | 0.23 | 1.00 | 1.04(1.01-1.06) | 0.0017   | 3.86E-10 | NA       | 0.06 | 0.99 | 0.05 |
| rs4866899       | 44444857 | C/T   | 0.23 | 0.98 | 1.04(1.01-1.06) | 0.0017   | 4.49E-10 | NA       | 0.06 | 0.98 | 0.05 |
| rs7712213       | 44451269 | A/C   | 0.23 | 0.98 | 1.04(1.01-1.06) | 0.002    | 5.30E-10 | NA       | 0.07 | 0.98 | 0.05 |
| rs6451762       | 44463186 | C/T   | 0.24 | 0.96 | 1.04(1.01-1.06) | 0.0023   | 7.36E-10 | NA       | 0.06 | 0.98 | 0.05 |
| rs7703171       | 44441175 | C/T   | 0.23 | 0.95 | 1.04(1.01-1.06) | 0.0018   | 8.24E-10 | NA       | 0.06 | 0.95 | 0.05 |
| rs6879342       | 44473605 | A/G   | 0.24 | 0.98 | 1.03(1.01-1.06) | 0.0067   | 3.57E-09 | NA       | 0.07 | 0.96 | 0.06 |
| <b>Signal 3</b> |          |       |      |      |                 |          |          |          |      |      |      |
| rs200229088     | 44701817 | TTG/T | 0.31 | 0.65 | 1.09(1.07-1.12) | 2.30E-12 | 5.61E-04 | 1.12E-05 | 0.14 | 0.05 | 1.00 |

---

**Supplementary Table 3.** ER/PR status, genotype and copy number at 5p12 of breast cell lines used in functional assays.

|            | <b>ER<sup>a</sup><br/>status</b> | <b>PR<sup>b</sup><br/>status</b> | <b>Signal 1<br/>rs10941679</b> | <b>Signal 2<br/>rs6864776</b> | <b>Signal 3<br/>rs200229088</b> | <b>Copy<br/>Number<sup>c</sup></b> | <b>Haplotype</b> |
|------------|----------------------------------|----------------------------------|--------------------------------|-------------------------------|---------------------------------|------------------------------------|------------------|
| SVCT       | -                                | -                                | AA                             | GG                            | TTG/T                           | Not det                            | A/B              |
| MCF10A     | -                                | -                                | AA                             | GG                            | TTG/T                           | Not det                            | A/B              |
| T47D       | +                                | +                                | AA                             | AA                            | TTG/T                           | Gain                               | C/D              |
| ZR751      | +                                | +                                | AA                             | AA                            | TTG/T                           | Normal                             | C/D              |
| MDA-MB-361 | +                                | -                                | AA                             | AA                            | TTG/T                           | Gain                               | C/D              |
| MCF7       | +                                | +                                | AA                             | AG                            | TTG/T                           | Gain                               | Not det          |
| Hs578T     | -                                | -                                | AA                             | AG                            | TTG/T                           | Gain                               | Not det          |
| BT474      | +                                | +                                | AG                             | AG                            | TTG/T                           | Gain                               | Not det          |
| Bre80      | -                                | -                                | AG                             | AG                            | TTG/T                           | Not det                            | Not det          |
| MDA-MB-231 | -                                | -                                | AG                             | AG                            | TTG/T                           | Gain                               | Not det          |
| BT-20      | -                                | -                                | GG                             | AA                            | TTG/T                           | Gain                               | G/H              |
| MDA-MB-468 | -                                | -                                | GG                             | AA                            | TTG/T                           | Gain                               | G/H              |

<sup>a</sup>Estrogen receptor-alpha, <sup>b</sup>Progesterone receptor, <sup>c</sup>Copy number status from array CGH data (segmentation of normalized log<sub>2</sub> ratios) generated by the Cancer Cell Line Encyclopedia (CCLE), Not det = Not determined.



**Supplementary Table 4.** Oligonucleotides used for qRT-PCR of putative noncoding RNAs.

| <b>qRT Primer</b>       | <b>Sequence (5' to 3')</b> |
|-------------------------|----------------------------|
| FGF10-AS1FOR            | TGCACCAACATCCATAACTCCTCG   |
| FGF10-AS1REV            | CTTTGTGAAGGAAAGCTGGACAGG   |
| BRCAT54FOR              | TGTGTGCTTAGACCTGACGCTGG    |
| BRCAT54REV              | CTCCTCACATGGCAGGAAGAAGG    |
| RP11-503D12.1FOR        | CAAGGTCAGTTGGCATTGTTCTGG   |
| RP11-503D12.1REV        | CAACCACCATGTCAAGGAACTCTAGC |
| RP11-473L15.3FOR        | CACATGCATTGGCTATGACCTTGC   |
| RP11-473L15.3REV        | GCTGGCCATAAAGCTTCAATGTCC   |
| TATA-binding proteinFOR | CATGGATCAGAACAACAGCCTGC    |
| TATA-binding proteinREV | TTGTGAGAGTCTGTGAGTGGAAGAGC |

**Supplementary Table 5.** Cell lines used in the study.

| <b>Cell line<sup>1,2</sup></b> | <b>Source</b>                    |
|--------------------------------|----------------------------------|
| SVCT                           | ECACC 94122105                   |
| MCF10A                         | ATCC CRL-10317                   |
| T47D                           | ATCC HTB-133                     |
| ZR751                          | ATCC CRL-1500                    |
| MDA-MB-361                     | Gift from S. Lankani, UQCCR, AUS |
| MCF7                           | ATCC HTB-22                      |
| Hs578T                         | ATCC HTB-126                     |
| BT474                          | ATCC HTB-20                      |
| Bre80                          | Gift from R. Reddel, CMRI, AUS   |
| MDA-MB-231                     | ATCC HTB-26                      |
| BT-20                          | ATCC HTB-19                      |
| MDA-MB-468                     | ATCC HTB-132                     |

<sup>1</sup> Cell lines used in experiments were within passages 15-30.

<sup>2</sup> Cell lines were routinely tested for mycoplasma and short tandem repeat (STR) profiled.

**Supplementary Table 6.** Oligonucleotides used in 3C assays.

| <b>3C Primer (<i>Eco</i>RI)</b> | <b>Sequence (5' to 3')</b>          |
|---------------------------------|-------------------------------------|
| FGF10 promoter bait             | GCTGCTCTTCTGTACAGCGTGATGACAAGAGG    |
| MRPS30 promoter bait            | CCTTCACAGAAGTAAGCAACATGAGGGAAGC     |
| HCN1 promoter bait              | TCCCAGTGGCACCTGCAAGTATGTGC          |
| PRE Fragment 1                  | CTAAGACTGTCTCACCATGGAGCAACTCATGC    |
| PRE Fragment 2                  | TGGCTTCCTGCCACTTGTTTCCTAATGC        |
| PRE Fragment 3                  | CTCCTTGCTGTGAGAAGGTTGCACATCC        |
| PRE Fragment 4                  | AGCACAAGAGCAGCCTCTACTGGGATATGC      |
| PRE Fragment 5                  | TCCAAGTGAGTCAGTCTCCTGCCTCAGG        |
| PRE Fragment 6                  | TCACTTGCTTTCTAGATTTGTGATTCTGCTTTCC  |
| PRE Fragment 7                  | GTCCAGAGTCAAGTGGAGGAGATAACTCAAGGG   |
| PRE Fragment 8                  | GAGGAATCAGGCAATCTTCATAAATATGGCTTACC |
| PRE Fragment 9                  | GGAATGCAAAGTGCAGCTATTGCTCTGC        |
| PRE Fragment 10                 | GAAAATTTGGCATCATCCTTAGTGCACAGTAGG   |
| PRE Fragment 11                 | CTGTGTAAGTTACAGAGCCATGATCATTGGTGG   |
| PRE Fragment 12                 | GCCACATCCCTAGATGCCATGGTCC           |

**Supplementary Table 7.** Oligonucleotides used in cloning luciferase constructs.

| Primer                 | Sequence (5' to 3')             |
|------------------------|---------------------------------|
| FGF10 promoter FOR     | GATCGCCATAAAGTGCGTTTGC          |
| FGF10 promoter REV     | CTGGAAGGGTAAGACCCGATGC          |
| FGF10-AS1 promoter FOR | CCCAGGCATAATTTACGCTGAGG         |
| FGF10-AS1 promoter REV | GCATTCACTTCTGGCCAGATCC          |
| MRPS30 promoter FOR    | ACTTTCCATGGCTCTGACTCAGTCC       |
| MRPS30 promoter REV    | CGGACCCAGAGGTCAACTTAAGC         |
| BRCAT54 promoter FOR   | CCTATCGTGAACGGTTATTGTGAGC       |
| BRCAT54 promoter REV   | AGTTCCTGGCAAAGGAGGTTGC          |
| 5p12 enhancer FOR      | GACTCTGTATCTTCACGCATTTCCAGG     |
| 5p12 enhancer REV      | TTAGAGACCAGAAATGTGGGCAAAGG      |
| rs10941679 mut FOR     | GCTTTTTATTGACTGTTGGAAAGAACACAGC |
| rs10941679 mut REV     | GCTGTGTTCTTTCCACAGTCAATAAAAAGC  |

**Supplementary Table 8.** Oligonucleotides used in EMSAs.

| SNP         | allele <sup>a</sup> | Sequence (5' to 3') <sup>b</sup>               |
|-------------|---------------------|------------------------------------------------|
| rs10941679  | com                 | <sup>BIO</sup> GCTTTTTATTGACTATGGAAAGAACACAGC  |
| rs10941679  | min                 | <sup>BIO</sup> GCTTTTTATTGACTGTTGGAAAGAACACAGC |
| Neg control |                     | AGAGATTGCCTGACGTCAGAGAGCTAG                    |

<sup>a</sup> com: common allele, min: minor allele

<sup>b</sup> BIO: 5' biotinylation (present on both the sense and antisense strands of the duplex)

**Supplementary Table 9.** EMSA competitor duplexes and their target DNA binding proteins.

| <b>Competition Target</b> | <b>Sequence (5' to 3')</b>     |
|---------------------------|--------------------------------|
| AP1                       | CGCTTGATGACTCAGCCGGAA          |
| AP2                       | GATCGAACTGACCGCCCGCGGCCCGT     |
| CEBP                      | TGCAGATTGCGCAATCTGCA           |
| CTCF                      | AAGAAACCGCTAGGGGGCCTACT        |
| FOXA1                     | CTGGTCTTAAAGGTGTTTACCTTGTCTGAT |
| FOXA2                     | GTTGACTAAGTCAATAATCAGAATCAG    |
| GATA3                     | CACTTGATAACAGAAAGTGATAACTCT    |
| HNF6                      | GATTCATATTGATTTCAAAA           |
| HOXA10                    | GCATTCAGAAGGTTATAGCTTT         |
| MYC                       | TCAGACCACGTGGTCGGG             |
| NFKB                      | AGTTGAGGGGACTTTCCCAGGC         |
| OCT1                      | TGTCGAATGCAAATCACTAGAA         |
| SP1                       | ATTCGATCGGGGCGGGGCGAGC         |

**Supplementary Table 10.** Oligonucleotides used for ChIP-qPCR analyses.

| <b>Name</b>         | <b>Sequence (5' to 3')</b> |
|---------------------|----------------------------|
| ChIP rs10941679 FOR | TTGAATCAGATGTGTAGTGCTTCC   |
| ChIP rs10941679 REV | AACCTGAATGCAGCAAAATAGC     |
| ChIP negcontrol FOR | CTAAGGACGAGATGCACATGG      |
| ChIP negcontrol REV | TCAAGTTTCCAACACTCCAACAGG   |

## **CONSORTIA**

For members of kConFab, see <http://www.kconfab.org/Organisation/Members.aspx>; for AOCS, see [http://www.aocstudy.org/org\\_coll.asp](http://www.aocstudy.org/org_coll.asp).

### **Norwegian Breast Cancer Study (NBCS) members:**

Kristine K.Sahlberg, Lars Ottestad, Rolf Kåresen, Anita Langerød, Ellen Schlichting, Marit Muri Holmen, Toril Sauer, Vilde Haakensen, Olav Engebråten, Bjørn Naume, Cecile E. Kiserud, Kristin V. Reinertsen, Åslaug Helland, Margit Riis, Ida Bukholm, Per Eystein Lønning, Jürgen Geisler, Grethe I. Grenaker Alnæs, OSBREAC

### **BCAC INVESTIGATING GROUPS:**

The Australian Breast Cancer Family Study (ABCFS) would like to thank Maggie Angelakos, Judi Maskiell, Gillian Dite. ABCFS was supported by grant UM1 CA164920 from the National Cancer Institute (USA). The content of this manuscript does not necessarily reflect the views or policies of the National Cancer Institute or any of the collaborating centers in the Breast Cancer Family Registry (BCFR), nor does mention of trade names, commercial products, or organizations imply endorsement by the USA Government or the BCFR. The ABCFS was also supported by the National Health and Medical Research Council of Australia, the New South Wales Cancer Council, the Victorian Health Promotion Foundation (Australia) and the Victorian Breast Cancer Research Consortium. J.L.H. is a National Health and Medical Research Council (NHMRC) Australia Fellow and a Victorian Breast Cancer Research Consortium Group Leader. M.C.S. is a NHMRC Senior Research Fellow and a Victorian Breast Cancer Research Consortium Group Leader. The ABCS study was supported by the Dutch Cancer Society [grants NKI 2007-3839; 2009 4363]; BBMRI-NL, which is a Research Infrastructure financed by the Dutch government (NWO 184.021.007); and the Dutch National Genomics Initiative. The ACP study wishes to thank the participants in the Thai Breast Cancer study. Special Thanks also go to the Thai Ministry of Public Health (MOPH), doctors and nurses who helped with the data collection process. Finally, the study would like to thank Dr Prat Boonyawongviroj, the former Permanent Secretary of MOPH and Dr Pornthep Siriwanarungsan, the Department Director-General of Disease Control who have supported the study throughout. The ACP study is funded by the Breast Cancer Research Trust, UK. The BBCC study would like to thank Matthias Rübner, Alexander Hein, Michael Schneider. The work of the BBCC was partly funded by ELAN-Fond of the University Hospital of Erlangen. The BBCCS would like to thank Eileen Williams, Elaine Ryder-Mills, Kara Sargus. The BBCCS is funded by Cancer Research UK and Breast Cancer Now and acknowledges NHS funding to the NIHR Biomedical Research Centre, and the National Cancer Research Network (NCRN). The BIGGS would like to thank Niall McInerney, Gabrielle Colleran, Andrew Rowan, Angela Jones. ES is supported by NIHR Comprehensive Biomedical Research Centre, Guy's & St. Thomas' NHS Foundation Trust in partnership with King's College London, United Kingdom. I.T. is supported by the Oxford Biomedical Research Centre and by core funding to the Wellcome Trust Centre for Human Genetics from the Wellcome Trust (090532/Z/09/Z). The BSUCH would like to thank Peter Bugert, Medical Faculty Mannheim. The BSUCH study was supported by the

Dietmar-Hopp Foundation, the Helmholtz Society and the German Cancer Research Center (DKFZ). The CECILE study was funded by Fondation de France, Institut National du Cancer (INCa), Ligue Nationale contre le Cancer, Ligue contre le Cancer Grand Ouest, Agence Nationale de Sécurité Sanitaire (ANSES), Agence Nationale de la Recherche (ANR). The CGPS study would like to thank Staff and participants of the Copenhagen General Population Study. It would also like to thank Dorthe Uldall Andersen, Maria Birna Arnadottir, Anne Bank and Dorthe Kjeldgård Hansen for the excellent technical assistance: The Danish Breast Cancer Group (DBCG) is acknowledged for the tumor information. The Danish Cancer Biobank is acknowledged for providing infrastructure for the collection of blood samples for the cases. The CGPS was supported by the Chief Physician Johan Boserup and Lise Boserup Fund, the Danish Medical Research Council and Herlev Hospital. The CNIO-BCS would like to thank Guillermo Pita, Charo Alonso, Daniel Herrero, Nuria Álvarez, Pilar Zamora, Primitiva Menendez, the Human Genotyping-CEGEN Unit (CNIO). The CNIO-BCS was supported by the Genome Spain Foundation, the Red Temática de Investigación Cooperativa en Cáncer and grants from the Asociación Española Contra el Cáncer and the Fondo de Investigación Sanitario (PI11/00923 and PI081120). The Human Genotyping-CEGEN Unit (CNIO) is supported by the Instituto de Salud Carlos III. The CTS study would like to thank the CTS steering committee: Leslie Bernstein, Susan Neuhausen, James Lacey, Sophia Wang, Huiyan Ma, Yani Lu, and Jessica Clague DeHart at the Beckman Research Institute of the City of Hope, Dennis Deapen, Rich Pinder, Eunjung Lee, and Fred Schumacher at the University of Southern California, Pam Horn-Ross, Peggy Reynolds, Christina Clarke and David Nelson at the Cancer Prevention Institute of California, and Hoda Anton-Culver, Hannah Park, and Al Zogas at the University of California Irvine. The CTS was initially supported by the California Breast Cancer Act of 1993 and the California Breast Cancer Research Fund (contract 97-10500) and is currently funded through the National Institutes of Health (R01 CA77398). Collection of cancer incidence data was supported by the California Department of Public Health as part of the statewide cancer reporting program mandated by California Health and Safety Code Section 103885. HAC receives support from the Lon V Smith Foundation (LVS39420). The ESTHER study would like to thank Hartwig Ziegler, Sonja Wolf, Volker Hermann. The ESTHER study was supported by a grant from the Baden Württemberg Ministry of Science, Research and Arts. Additional cases were recruited in the context of the VERDI study, which was supported by a grant from the German Cancer Aid (Deutsche Krebshilfe). The GENICA Network would like to thank Dr. Margarete Fischer-Bosch-Institute of Clinical Pharmacology, Stuttgart, and University of Tübingen, Germany; [HB, Wing-Yee Lo, Christina Justenhoven], Department of Internal Medicine, Evangelische Kliniken Bonn gGmbH, Johanniter Krankenhaus, Bonn, Germany [Yon-Dschun Ko, Christian Baisch], Institute of Pathology, University of Bonn, Germany [Hans-Peter Fischer], Molecular Genetics of Breast Cancer, Deutsches Krebsforschungszentrum (DKFZ), Heidelberg, Germany [UH], Institute for Prevention and Occupational Medicine of the German Social Accident Insurance, Institute of the Ruhr University Bochum (IPA), Bochum, Germany [Thomas Brüning, Beate Pesch, Sylvia Rabstein, Anne Lotz]; and Institute of Occupational Medicine and Maritime Medicine, University Medical Center Hamburg-Eppendorf, Germany [Volker Harth]. The GENICA was funded by the Federal Ministry of Education and Research (BMBF) Germany grants 01KW9975/5, 01KW9976/8, 01KW9977/0 and 01KW0114, the Robert Bosch Foundation, Stuttgart, Deutsches Krebsforschungszentrum

(DKFZ), Heidelberg, the Institute for Prevention and Occupational Medicine of the German Social Accident Insurance, Institute of the Ruhr University Bochum (IPA), Bochum, as well as the Department of Internal Medicine, Evangelische Kliniken Bonn gGmbH, Johanniter Krankenhaus, Bonn, Germany. The HEBCS would like to thank Carl Blomqvist, Kristiina Aittomäki, Taru A. Muranen and Irja Erkkilä. The HEBCS was financially supported by the Helsinki University Central Hospital Research Fund, Academy of Finland (266528), the Finnish Cancer Society, The Nordic Cancer Union and the Sigrid Juselius Foundation. The HERPACC was supported by MEXT Kakenhi (No. 170150181 and 26253041) from the Ministry of Education, Science, Sports, Culture and Technology of Japan, by a Grant-in-Aid for the Third Term Comprehensive 10-Year Strategy for Cancer Control from Ministry Health, Labour and Welfare of Japan, by Health and Labour Sciences Research Grants for Research on Applying Health Technology from Ministry Health, Labour and Welfare of Japan, by National Cancer Center Research and Development Fund, and "Practical Research for Innovative Cancer Control (15ck0106177h0001)" from Japan Agency for Medical Research and development, AMED, and Cancer Bio Bank Aichi. The HMBCS would like to thank Natalia Antonenkova, Peter Hillemanns, Hans Christiansen and Johann H. Karstens. The HMBCS was supported by a grant from the Friends of Hannover Medical School and by the Rudolf Bartling Foundation. Financial support for KARBAC was provided through the regional agreement on medical training and clinical research (ALF) between Stockholm County Council and Karolinska Institutet, the Swedish Cancer Society, The Gustav V Jubilee foundation and Bert von Kantzows foundation. The KBCP would like to thank Eija Myöhänen, Helena Kemiläinen. The KBCP was financially supported by the special Government Funding (EVO) of Kuopio University Hospital grants, Cancer Fund of North Savo, the Finnish Cancer Organizations, the Academy of Finland and by the strategic funding of the University of Eastern Finland. The kConFab/AOCS study would like to thank Heather Thorne, Eveline Niedermayr, all the kConFab research nurses and staff, the heads and staff of the Family Cancer Clinics, and the Clinical Follow Up Study (which has received funding from the NHMRC, the National Breast Cancer Foundation, Cancer Australia, and the National Institute of Health (USA)) for their contributions to this resource, and the many families who contribute to kConFab. kConFab is supported by a grant from the National Breast Cancer Foundation, and previously by the National Health and Medical Research Council (NHMRC), the Queensland Cancer Fund, the Cancer Councils of New South Wales, Victoria, Tasmania and South Australia, and the Cancer Foundation of Western Australia. The LAABC study would like to thank all the study participants and the entire data collection team, especially Annie Fung and June Yashiki. LAABC is supported by grants (1RB-0287, 3PB-0102, 5PB-0018, 10PB-0098) from the California Breast Cancer Research Program. Incident breast cancer cases were collected by the USC Cancer Surveillance Program (CSP), which is supported under subcontract by the California Department of Health. The CSP is also part of the National Cancer Institute's Division of Cancer Prevention and Control Surveillance, Epidemiology, and End Results Program, under contract number N01CN25403. The LMBC would like to thank Gilian Peuteman, Dominiek Smeets, Thomas Van Brussel and Kathleen Corthouts. LMBC is supported by the 'Stichting tegen Kanker' (232-2008 and 196-2010). Diether Lambrechts is supported by the FWO and the KULPFV/10/016-SymBioSysII. The MARIE study would like to thank Petra Seibold, Dieter Flesch-Janys, Judith Heinz, Nadia Obi, Alina Vrieling, Sabine Behrens, Ursula Eilber, Muhabbet Celik, Til Olchers, Stefan

Nickels. The MARIE study was supported by the Deutsche Krebshilfe e.V. [70-2892-BR I], the Hamburg Cancer Society, the German Cancer Research Center and the genotype work in part by the Federal Ministry of Education and Research (BMBF) Germany [01KH0402]. The MBCSG (Milan Breast Cancer Study Group) would like to thank Paolo Peterlongo of the Fondazione FIRC Institute of Molecular Oncology (IFOM); Siranoush Manoukian, Bernard Peissel, Daniela Zaffaroni and Jacopo Azzollini of the Fondazione IRCCS Istituto Nazionale dei Tumori (INT); Bernado Bonanni and Irene Feroce of the Istituto Europeo di Oncologia (IEO); and the personnel of the Cogentech Cancer Genetic Test Laboratory. MBCSG is supported by grants from the Italian Association for Cancer Research (AIRC) and by funds from the Italian citizens who allocated the 5/1000 share of their tax payment in support of the Fondazione IRCCS Istituto Nazionale Tumori, according to Italian laws (INT-Institutional strategic projects "5x1000"). The MCBCS was supported by the NIH grants CA192393, CA116167, CA176785 an NIH Specialized Program of Research Excellence (SPORE) in Breast Cancer [CA116201], and the Breast Cancer Research Foundation and a generous gift from the David F. and Margaret T. Grohne Family Foundation. MCCS cohort recruitment was funded by VicHealth and Cancer Council Victoria. The MCCS was further supported by Australian NHMRC grants 209057, 251553 and 504711 and by infrastructure provided by Cancer Council Victoria. Cases and their vital status were ascertained through the Victorian Cancer Registry (VCR) and the Australian Institute of Health and Welfare (AIHW), including the National Death Index and the Australian Cancer Database. The MEC was supported by NIH grants CA63464, CA54281, CA098758 and CA132839. The MTLGEBCS would like to thank Martine Tranchant (Cancer Genomics Laboratory, CHU de Québec Research Center), Marie-France Valois, Annie Turgeon and Lea Heguy (McGill University Health Center, Royal Victoria Hospital; McGill University) for DNA extraction, sample management and skillful technical assistance. J.S. is Chairholder of the Canada Research Chair in Oncogenetics. The work of MTLGEBCS was supported by the Quebec Breast Cancer Foundation, the Canadian Institutes of Health Research for the "CIHR Team in Familial Risks of Breast Cancer" program – grant # CRN- 87521 and the Ministry of Economic Development, Innovation and Export Trade – grant # PSR-SIIRI-701. The MYBRCA study would like to thank Phuah Sze Yee, Peter Kang, Kang In Nee, Kavitta Sivanandan, Shivaani Mariapun, Yoon Sook-Yee, Teh Yew Ching and Nur Aishah Mohd Taib for DNA Extraction and patient recruitment. MYBRCA is funded by research grants from the Malaysian Ministry of Science, Technology and Innovation (MOSTI), Malaysian Ministry of Higher Education (UM.C/HIR/MOHE/06) and Cancer Research Initiatives Foundation (CARIF). Additional controls were recruited by the Singapore Eye Research Institute, which was supported by a grant from the Biomedical Research Council (BMRC08/1/35/19/550), Singapore and the National medical Research Council, Singapore (NMRC/CG/SERI/2010). The NBCS has received funding from the K.G. Jebsen Centre for Breast Cancer Research; the Research Council of Norway grant 193387/V50 (to A-L Børresen-Dale and V.N. Kristensen) and grant 193387/H10 (to A-L Børresen-Dale and V.N. Kristensen), South Eastern Norway Health Authority (grant 39346 to A-L Børresen-Dale) and the Norwegian Cancer Society (to A-L Børresen-Dale and V.N. Kristensen). The NBCS Collaborators are: Dr. Kristine K. Sahlberg, PhD (Department of Research, Vestre Viken Hospital, Drammen, Norway and Department of Cancer Genetics, Institute for Cancer Research, Oslo University Hospital-Radiumhospitalet, Oslo, Norway), Dr. Lars Ottestad, MD (Department of



Cancer Genetics, Institute for Cancer Research, Oslo University Hospital-Radiumhospitalet, Oslo, Norway), Prof. Em. Rolf Kåresen, MD (Institute of Clinical Medicine, Faculty of Medicine, University of Oslo, Oslo, Norway and Department of Breast- and Endocrine Surgery, Division of Surgery, Cancer and Transplantation, Oslo University Hospital, Oslo, Norway), Dr. Anita Langerød, PhD (Department of Cancer Genetics, Institute for Cancer Research, Oslo University Hospital-Radiumhospitalet, Oslo, Norway), Dr. Ellen Schlichting, MD (Section for Breast- and Endocrine Surgery, Department of Cancer, Division of Surgery, Cancer and Transplantation Medicine, Oslo University Hospital, Oslo, Norway), Dr. Marit Muri Holmen, MD (Department of Radiology and Nuclear Medicine, Oslo University Hospital, Oslo, Norway), Prof. Toril Sauer, MD (Department of Pathology at Akershus University hospital, Lørenskog, Norway and Institute of Clinical Medicine, Faculty of Medicine, University of Oslo, Oslo, Norway), Dr. Vilde Haakensen, MD (Department of Cancer Genetics, Institute for Cancer Research, Oslo University Hospital-Radiumhospitalet, Oslo, Norway), Dr. Olav Engebråten, MD (Department of Tumor Biology, Institute for Cancer Research, Oslo University Hospital, Oslo, Norway, Department of Oncology, Division of Surgery and Cancer and Transplantation Medicine, Oslo University Hospital, Oslo, Norway and Institute for Clinical Medicine, Faculty of Medicine, University of Oslo, Oslo, Norway), Prof. Bjørn Naume, MD (Department of Oncology, Division of Surgery and Cancer and Transplantation Medicine, Oslo University Hospital-Radiumhospitalet, Oslo, Norway), Dr. Cecile E. Kiserud, MD (National Advisory Unit on Late Effects after Cancer Treatment, Department of Oncology, Oslo University Hospital, Oslo, Norway and Department of Oncology, Oslo University Hospital, Oslo, Norway), Dr. Kristin V. Reinertsen, MD (National Advisory Unit on Late Effects after Cancer Treatment, Department of Oncology, Oslo University Hospital, Oslo, Norway and Department of Oncology, Oslo University Hospital, Oslo, Norway), Assoc. Prof. Åslaug Helland, MD (Department of Cancer Genetics, Institute for Cancer Research and Department of Oncology, Oslo University Hospital-Radiumhospitalet, Oslo, Norway), Dr. Margit Riis, MD (Dept of Breast- and Endocrine Surgery, Oslo University Hospital, Ullevål, Oslo, Norway), Dr. Ida Bukholm, MD (Department of Breast-Endocrine Surgery, Akershus University Hospital, Oslo, Norway and Department of Oncology, Division of Cancer Medicine, Surgery and Transplantation, Oslo University Hospital, Oslo, Norway), Prof. Per Eystein Lønning, MD (Section of Oncology, Institute of Medicine, University of Bergen and Department of Oncology, Haukeland University Hospital, Bergen, Norway), OSBREAC (Oslo Breast Cancer Research Consortium; Oslo University Hospital) and Grethe I. Grenaker Alnæs, M.Sc. (Department of Cancer Genetics, Institute for Cancer Research, Oslo University Hospital-Radiumhospitalet, Oslo, Norway). The NBHS\_TN study would like to thank participants and research staff for their contributions and commitment to this study. The NBHS was supported by NIH grant R01CA100374. Biological sample preparation was conducted the Survey and Biospecimen Shared Resource, which is supported by P30 CA68485. The OBCS study would like to thank Meeri Otsukka, Kari Mononen, Mervi Grip, Saira Kauppila. The OBCS was supported by research grants from the Finnish Cancer Foundation, the Academy of Finland (grant number 250083, 122715 and Center of Excellence grant number 251314), the Finnish Cancer Foundation, the Sigrid Juselius Foundation, the University of Oulu, the University of Oulu Support Foundation and the special Governmental EVO funds for Oulu University Hospital -based research activities. The OFBCR study would like to thank Teresa Selander, Nayana Weerasooriya. The Ontario Familial Breast Cancer Registry

(OFBCR) was supported by grant UM1 CA164920 from the National Cancer Institute (USA). The content of this manuscript does not necessarily reflect the views or policies of the National Cancer Institute or any of the collaborating centers in the Breast Cancer Family Registry (BCFR), nor does mention of trade names, commercial products, or organizations imply endorsement by the USA Government or the BCFR. The ORIGO study would like to thank E. Krol-Warmerdam, and J. Blom for patient accrual, administering questionnaires, and managing clinical information. The LUMC survival data were retrieved from the Leiden hospital-based cancer registry system (ONCDOC) with the help of Dr. J. Molenaar. The ORIGO study was supported by the Dutch Cancer Society (RUL 1997-1505) and the Biobanking and Biomolecular Resources Research Infrastructure (BBMRI-NL CP16). The PBCS study would like to thank Louise Brinton, Mark Sherman, Neonila Szeszenia-Dabrowska, Beata Peplonska, Witold Zatonski, Pei Chao, Michael Stagner. The PBCS was funded by Intramural Research Funds of the National Cancer Institute, Department of Health and Human Services, USA. The pKARMA study would like to thank The Swedish Medical Research Counsel. The pKARMA study was supported by Märit and Hans Rausings Initiative Against Breast Cancer. The RBCS study would like to thank Petra Bos, Jannet Blom, Ellen Crepin, Elisabeth Huijskens, Annette Heemskerk, the Erasmus MC Family Cancer Clinic. The RBCS was funded by the Dutch Cancer Society (DDHK 2004-3124, DDHK 2009- 4318). The SASBAC would like to thank The Swedish Medical Research Counsel. The SASBAC study was supported by funding from the Agency for Science, Technology and Research of Singapore (A\*STAR), the US National Institute of Health (NIH) and the Susan G. Komen Breast Cancer Foundation. The SBCGS would like to thank participants and research staff for their contributions and commitment to this study. The SBCGS was supported primarily by NIH grants R01CA64277, R01CA148667, and R37CA70867. Biological sample preparation was conducted the Survey and Biospecimen Shared Resource, which is supported by P30 CA68485. The scientific development and funding of this project were, in part, supported by the Genetic Associations and Mechanisms in Oncology (GAME-ON) Network U19 CA148065. The SBCS would like to thank Sue Higham, Helen Cramp, Sabapathy Balasubramanian, Ian Borck and Dan Connley. The SBCS was supported by Yorkshire Cancer Research S295, S299, S305PA. The SEARCH study would like to thank The SEARCH and EPIC teams. SEARCH is funded by a programme grant from Cancer Research UK [C490/A10124] and supported by the UK National Institute for Health Research Biomedical Research Centre at the University of Cambridge. SEBCS was supported by the BRL (Basic Research Laboratory) program through the National Research Foundation of Korea funded by the Ministry of Education, Science and Technology (2012-0000347). The SGBCC study would like to thank the participants and research coordinator Kimberley Chua. SGBCC is funded by the NUS start-up Grant, National University Cancer Institute Singapore (NCIS) Centre Grant and the NMRC Clinician Scientist Award. Additional controls were recruited by the Singapore Consortium of Cohort Studies-Multi-ethnic cohort (SCCS-MEC), which was funded by the Biomedical Research Council, grant number: 05/1/21/19/425. The SKKDKFZS study thanks all study participants, clinicians, family doctors, researchers and technicians for their contributions and commitment to this study. SKKDKFZS is supported by the DKFZ. The SZBCS was supported by Grant PBZ\_KBN\_122/P05/2004. The TBCS was funded by The National Cancer Institute Thailand. The TNBCC was supported by: a Specialized Program of Research Excellence (SPORE) in Breast Cancer (CA116201), a

grant from the Breast Cancer Research Foundation, a generous gift from the David F. and Margaret T. Grohne Family Foundation and the Ting Tsung and Wei Fong Chao Foundation, the Stefanie Spielman Breast Cancer fund and the OSU Comprehensive Cancer Center, DBBR (a CCSG Share Resource by National Institutes of Health Grant P30 CA016056), the Hellenic Cooperative Oncology Group research grant (HR R\_BG/04) and the Greek General Secretary for Research and Technology (GSRT) Program, Research Excellence II, the European Union (European Social Fund – ESF), and Greek national funds through the Operational Program "Education and Lifelong Learning" of the National Strategic Reference Framework (NSRF) - ARISTEIA. The TWBCS is supported by the Taiwan Biobank project of the Institute of Biomedical Sciences, Academia Sinica, Taiwan. The UKBGS study would like to thank Breast Cancer Now and the Institute of Cancer Research (ICR) for support and funding of the Breakthrough Generations Study, and the study participants, study staff, and the doctors, nurses and other health care providers and health information sources who have contributed to the study. We acknowledge NHS funding to the Royal Marsden/ICR NIHR Biomedical Research Centre. The UKBGS is funded by Breast Cancer Now and the Institute of Cancer Research (ICR), London. ICR acknowledges NHS funding to the NIHR Biomedical Research Centre.
